1 **Inducible Cooperation in a Synthetic Gut Bacterial Consortium Introduces**  
2 **Population Balance and Stability**

3

4 Marika Ziesack<sup>1,6</sup>, Travis Gibson<sup>3,6</sup>, Andrew M. Shumaker<sup>1,5</sup>, John K.W. Oliver<sup>1,4</sup>, David  
5 T. Riglar<sup>1,2</sup>, Tobias W. Giessen<sup>2</sup>, Nicholas V. DiBenedetto<sup>3</sup>, Kriti Lall<sup>1,3</sup>, Bryan B. Hsu<sup>2</sup>,  
6 Lynn Bry<sup>3</sup>, Jeffrey C. Way<sup>1,7</sup>, Pamela A. Silver<sup>1,2,7\*</sup>, Georg K. Gerber<sup>3,7\*</sup>

7

8 <sup>1</sup>Wyss Institute for Biologically Inspired Engineering, Harvard Medical School, Boston,  
9 Massachusetts, USA

10 <sup>2</sup>Department of Systems Biology, Harvard Medical School, 200 Longwood Ave. Boston,  
11 Massachusetts, USA

12 <sup>3</sup>Brigham and Women's Hospital, Harvard Medical School, 75 Francis Street, Boston,  
13 Massachusetts, USA

14 <sup>4</sup>Present address: ZBiotics, San Francisco, California USA

15 <sup>5</sup>Current address: Indigo, Boston, Massachusetts USA

16 <sup>6</sup>These authors contributed equally.

17 <sup>7</sup>These authors contributed equally.

18 \*correspondence: [ggerber@bwh.harvard.edu](mailto:ggerber@bwh.harvard.edu), [Pamela\\_Silver@hms.harvard.edu](mailto:Pamela_Silver@hms.harvard.edu)

19

20

21

22 **Abstract**

23 Commensal microbes in the gut do not act alone but instead as cooperative consortia to  
24 conduct their myriad functions. Cooperative interactions and feedback mechanisms are  
25 key to consortia performance, yet are often ignored in current synthetic biology efforts to  
26 engineer the microbiota. To this end, we engineered mutual metabolic dependencies  
27 between four heterogeneous gut-dwelling bacterial species. Each species was made  
28 auxotrophic for three amino acids and an overproducer for one amino acid to share with  
29 the other species. By performing dynamical systems inference from time-series  
30 measurements, we show that our engineering introduced positive interactions that either  
31 reversed or neutralized pre-existing competitive interactions and improved stability of  
32 the consortium. We further demonstrate that we can induce population balance in the  
33 engineered consortia, both *in vitro* and in the mouse gut, through nutrient and dietary  
34 manipulations. Our findings indicate that induced cooperation can introduce evenness  
35 and stability in a synthetic microbial ecosystem, and have implications for development  
36 of synthetic approaches to manipulate the microbiome.

37  
38  
39  
40  
41  
42  
43  
44  
45  
46  
47  
48  
49  
50  
51  
52

## 53 **Introduction**

54 In nature, microbes occur as conglomerates of various species with diverse sets of  
55 genomes and metabolic capabilities, allowing for division of labor and increased  
56 robustness (Hays et al., 2015a). For example, microbial consortia have been shown to  
57 withstand external perturbations such as invasion of other species, toxic compounds  
58 and nutrient sparseness (Burmølle et al., 2006; Lapara et al., 2002). A major driver for  
59 microbial consortia robustness is cooperative behavior through production of public  
60 goods and metabolic cross-feeding (Cavaliere et al., 2017). Consortia robustness is  
61 correlated with population balance among the microbes and an extensive network of  
62 interactions between species (Stelling et al., 2004; Stenuit and Agathos, 2015).

63  
64 Metagenomic analyses reveal nutrient auxotrophies as a prevalent feature of microbial  
65 communities, suggesting that cross-feeding might be a common mode of interaction in  
66 natural consortia (Mee et al., 2014; Pande et al., 2014). Examples of such natural  
67 microbial consortia include metabolically interacting communities in soil (Venail and  
68 Vives, 2013) and in the mammalian gut (Rakoff-Nahoum et al., 2016). Distributing  
69 metabolic capabilities over multiple species, a form of functional complementarity, can  
70 increase productivity of the consortium through more efficient resource utilization  
71 ((Pande et al., 2014; Savage et al., 2007).

72  
73 Amino acid cross-feeding is an attractive means to introduce cooperation into synthetic  
74 microbial consortia. These metabolites are more readily secreted than others, e.g., *E.*  
75 *coli* secretes certain amino acids upon starvation (Burkovski et al., 1995; Kaderbhai et  
76 al., 2003; Valle et al., 2008). Indeed, amino acids have been shown to play important  
77 roles in inter-species communication in natural systems (McCutcheon and Von Dohlen,  
78 2011). For instance, amino acids are used by *S. cerevisiae* to regulate nitrogen  
79 overflow, which leads to natural cross-feeding to lactic acid bacteria (Ponomarova et al.,  
80 2017). Numerous studies have engineered pairwise amino acid cross-feeding in *E. coli*  
81 producing normal amino acid levels and generated quantitative models to describe their  
82 behavior (Estrela and Gudelj, 2010; Kerner et al., 2012; Pande et al., 2014; Stolyar et  
83 al., 2007; Wintermute and Silver, 2010a).

84

85 Engineering cooperative microbial consortia has been of longstanding interest in  
86 synthetic biology; studies were performed to gain basic scientific insights, or as  
87 engineering proofs-of-principles (Mee et al., 2014; Wintermute and Silver, 2010b). With  
88 recent advances in our understanding of the human microbiota, there is increasing  
89 interest in applying synthetic biology approaches to construct a well-defined gut  
90 microbiome, living bacterial diagnostics and therapeutics (Riglar and Silver, 2018).  
91 Creating such diagnostics and treatments in the context of cooperative consortia has  
92 numerous potential advantages, including the aforementioned capability of consortia to  
93 carry out more complex functions in a more stable manner (Cavaliere et al., 2017), with  
94 stability in this context defined as the ability to withstand external disturbances.  
95 Additionally, consortia can potentially allow for greater safety and control. For instance,  
96 a consortium that maintains population balance through cooperativity could be used to  
97 control dosing of a therapeutic compound in the gut.

98

99 However, almost all prior synthetic biology studies that have engineered cooperativity in  
100 bacterial communities have used a single species (Kong et al., 2018; Mee et al., 2014;  
101 Wintermute and Silver, 2010b). However, natural microbial ecosystems contain a  
102 diversity of interacting species. In advancing synthetic biology to real applications in  
103 complex environments, it will be essential to expand engineering capabilities to diverse,  
104 multi-species consortia. Importantly, bacteria from naturally occurring ecosystems are  
105 likely to have pre-existing interactions, which are often competitive. These interactions  
106 must be considered and often overcome to achieve cooperative consortia.

107

108 As a step toward developing multi-species consortia, we have constructed a synthetic  
109 consortium of four different bacterial species, each derived from the mammalian gut,  
110 and engineered mutual interactions by cross-feeding of four amino acids. Using several  
111 experimental approaches, combined with statistical inference from data and  
112 computational modeling, we demonstrate our ability to engineer cooperativity in the  
113 consortium that overcomes pre-existing competitive interactions. Further, we show that  
114 this cooperativity is inducible through nutrient or dietary manipulations, and that the

115 engineered consortium exhibits population balance that is stable when subjected to  
116 perturbations *in vitro* and when introduced into the mammalian gut.

117

## 118 **Results**

### 119 **Cooperative Consortia Design and Engineering**

120 To gain intuition into synthetic consortia designs, we simulated behavior of non-  
121 interacting collections of four bacterial species versus consortia linked by  
122 positive/cooperative interactions (Figure 1A). Our simulations demonstrate that while a  
123 collection of non-interacting bacteria can exhibit population balance, it is highly  
124 susceptible to external disturbances that can drastically change the composition of the  
125 community. In particular, disturbances can readily cause a species to die out in the  
126 community. However, when we linked bacterial species through cooperative  
127 interactions, the resulting consortia can withstand much higher levels of external  
128 disturbances without dramatically altering its composition. Thus, our simulations  
129 suggest that engineering a network of positive interactions within a bacterial consortium  
130 could introduce stability towards environmental disturbances.

131

132 To construct our synthetic consortium, we selected four bacterial species, *Escherichia*  
133 *coli* NGF-1, *Salmonella enterica subsp enterica serovar Typhimurium LT2*, *Bacteroides*  
134 *thetaiotaomicron* VPI-5482, and *Bacteroides fragilis* 638R. These species are not only  
135 genetically tractable, but also able to survive in the mammalian gut in diverse niches  
136 and have varied abundances within the total microbiota. These characteristics allow us  
137 to investigate key synthetic biology engineering principles in a controlled, but more  
138 realistic context, and also maximize potential for downstream applications, for example  
139 for bacterial therapeutics and diagnostics in the gut.

140

141 *E. coli* NGF-1 was isolated from BALB/c mice, has been shown to stably colonize the  
142 mouse gut, and can be engineered with standard genetic tools (Kotula et al., 2014;  
143 Riglar et al., 2017). *S. Typhimurium LT2* was further attenuated by removing the  
144 pathogenicity islands SPI1 and SPI2, and thus did not cause any disease phenotype  
145 when administered to mice. The two *Bacteroides* species, *Bacteroides thetaiotaomicron*

146 and *Bacteroides fragilis*, are human commensals that can achieve high abundance in  
147 the mammalian gut, and are also genetically tractable.

148

149 We engineered each of the constituent species to depend on the other three by cross-  
150 feeding of the four metabolites L-methionine, L-histidine, L-tryptophan and L-arginine  
151 (hereafter referred to as Met, His, Trp and Arg) (Figure 1B). Auxotrophies for three of  
152 these amino acids were generated in each strain (*E. coli*: His, Trp and Arg;  
153 *S. Typhimurium*: Met, Trp, Arg; *B. theta*: Met, His, Arg; *B. fragilis*: Met, His, Trp), along  
154 with the ability to overproduce one amino acid in each strain (*E. coli*: Met; *S.*  
155 *Typhimurium*: His; *B. theta*: Trp; *B. fragilis*: Arg) (Table 1). *E. coli* and *S. Typhimurium*  
156 were engineered by sequential phage transduction from three single auxotroph strains.  
157 *E. coli* was transduced with genome fragments from BW25113 that contained insertions  
158 in *argA*, *trpC*, *hisA* (see Methods) and *S. Typhimurium* with genome fragments of the  
159 same parent strain with insertions in *argA*, *trpC*, *metA*. *Bacteroides spp.* triple knockout  
160 generation utilized the pExchange-tdk vector to precisely delete *metA*, *hisG* and *argF* in  
161 *B. theta* and *metA*, *hisG* and *trpC* in *B. fragilis*. To engineer overproduction of amino  
162 acids, we selected for bacterial strains that showed resistance to specific  
163 antimetabolites.

164

### 165 **Characterization of Auxotrophies and Overproduction**

166 To assess the auxotrophic strains' amino acid requirements, we measured growth on  
167 varying concentrations of each metabolite in the presence of non-limiting concentrations  
168 of all the other metabolites (Figure 2A). Each strain had a requirement for specific and  
169 differing levels of the amino acids. Overproduction of metabolites was measured in  
170 comparison to a defined amino acid standard using LC-MS (Figure 2A, horizontal bars).  
171 In order to compare overproduction with each species' amino acid requirements, we fit a  
172 sigmoidal curve to the growth response data (Figure 2A), to produce an expected  
173 concentration (OD600) for the species for a given overproduction rate. This comparison  
174 of requirements and overproduction levels provides information about the expected  
175 relative strengths of the engineered interactions.

176

177 *B. fragilis* was the highest overproducer (Arg at 362  $\mu$ M). Corresponding  
178 supplementation would allow growth of *E. coli* to OD 0.144, *S. Typhimurium* to OD  
179 0.166 and *B. theta* to OD 0.154. *B. theta* overproduced Trp at 34  $\mu$ M, allowing expected  
180 growth for *E. coli* to OD 0.411, *S. Typhimurium* to OD 0.156 and *B. fragilis* to OD 0.128.  
181 *E. coli* overproduced Met at 5.3  $\mu$ M, allowing expected growth of *S. Typhimurium* to OD  
182 0.032, *B. theta* to 0.017 and *B. fragilis* to OD 0.027. *S. Typhimurium* overproduces His  
183 at 16  $\mu$ M, allowing for expected growth of *E. coli* to OD 0.028, but not supporting  
184 *Bacteroides spp.* growth, which required concentrations higher than 100  $\mu$ M.  
185 Interestingly, the unengineered *Bacteroides spp.* also produced detectable amounts of  
186 some amino acids, whereas the other wild-type species did not. In the case of *B. theta*,  
187 the detected levels of Trp would, in principle, be high enough to support growth of other  
188 consortium members. Overall, our findings suggest relatively strong engineered  
189 cooperation from *Bacteroides spp.* to other strains, moderate cooperation from *E. coli* to  
190 other strains, and the weakest cooperation from *S. Typhimurium* to other strains.

191

## 192 **Amino Acid Overproducers can Rescue Growth Defects of Corresponding** 193 **Auxotrophs**

194 Having established amino acid requirements and overproduction levels for each strain,  
195 we assessed pairwise cross-feeding using culture supernatants from the overproducing  
196 and wild-type strains to test for growth of the corresponding auxotrophs (Figure 2b).  
197 Cells were grown for 24 hr before supernatant was collected (Figure 2c). Notably, three  
198 out of the four engineered species did not show any growth defect compared to the WT;  
199 *B. theta* growth was decreased by 3-fold. Extent of rescue was determined by OD600  
200 values after 24 hr of growth in supernatant that was diluted 1:1 with fresh media lacking  
201 the tested amino acid (Figure 2d). As another comparator, we grew the auxotrophic  
202 strains without amino acid supplementation and with full supplementation (1 mM of each  
203 amino acid). As expected, we detected no growth in any of the auxotrophs when no  
204 amino acid was supplied, and growth with full supplementation.

205

206 Consistent with our design, and our amino acid requirement and overproduction data, *E.*  
207 *coli* grew well in supernatant from engineered *B. theta* (180% of fully supplemented

208 growth) and *B. fragilis* (130%), and somewhat in supernatant from engineered *S.*  
209 *Typhimurium* (13%). Interestingly, *E. coli* grew better in *Bacteroides spp.* supernatant  
210 than in fully supplemented media, suggesting that these *Bacteroides spp.* may produce  
211 other beneficial metabolites for *E. coli*. *S. Typhimurium* grew relatively well in *E. coli*  
212 supernatant (88%), and also showed enhanced growth in the *Bacteroides spp.*  
213 supernatants (330% in *B. theta* supernatant, and 227% in *B. fragilis* supernatant). As  
214 expected from our requirement and overproduction data, *B. theta* is only marginally  
215 rescued by engineered *E. coli* (3%). Overall, these experiments indicate cross-feeding  
216 between the engineered bacterial strains.

217  
218 However, in some cases the supernatants did not perform as well as predicted or in  
219 comparison to co-cultures. *B. fragilis* rescued *B. theta* growth much less than expected  
220 (12%) from our overproduction data. This finding suggests that *B. fragilis* may secrete  
221 factors that inhibit *B. theta* growth, but not *E. coli* or *S. Typhimurium*. Indeed,  
222 competitive interactions among more closely related species have previously been  
223 reported, possibly due to competition for similar niches (Bauer et al., 2018). No growth  
224 by *B. theta* in *S. Typhimurium* supernatant was evident. *B. fragilis* was not rescued well  
225 by any of the strains (Figure 2d, blue panel). Taken together, these results may reflect  
226 production of toxic compounds that are enriched in supernatants of grown cultures but  
227 might play a lesser role in co-cultures.

228

229

### 230 **Cooperation and Population Balance of the Consortium *in vitro* is Inducible** 231 **Based on Amino Acid Abundance**

232 Having investigated pairwise interactions in our consortium, we next sought to  
233 characterize properties of the entire consortium versus individual members. Using a  
234 medium that we specifically designed to accommodate the four bacterial species in a  
235 single batch culture, and without amino acid supplementation, we grew monocultures  
236 and co-cultures of WT and the engineered consortia and estimated bacterial abundance  
237 (cfu/mL) via qPCR after 24 hr (Figure 3A,B).

238



239 By comparing growth of strains in monoculture to the full consortium co-culture, we can  
240 assess the degree of cooperativity in the bacterial community. We quantify this behavior  
241 using a cooperation factor, defined as the total concentration of the co-culture divided  
242 by the sum of the concentrations of the monocultures. According to this definition, a  
243 cooperation factor  $<1$  indicates competitive behavior, whereas a cooperation factor of  
244  $>1$  indicates cooperation. For the WT consortium, each of the strains grew better in  
245 monoculture than in co-culture (Figure 3B), with a cooperation factor of 0.14. This  
246 finding suggests pre-existing negative interactions among the WT species, e.g.,  
247 competition for nutrients or production of compounds toxic to the other species. For the  
248 engineered consortia, the cooperation factor is 1.18, indicating that our engineering  
249 strategy has led to a net growth improvement when the complete consortium is able to  
250 interact. Note that much of the growth improvement is due to *E. coli* and *S.*  
251 *Typhimurium* growth, whereas *B. theta* and *B. fragilis* growth is essentially unchanged.  
252 This suggests that our engineering introduced net positive interactions for *E. coli* and *S.*  
253 *Typhimurium*, while neutralizing competitive effects on *B. theta* and *B. fragilis* present in  
254 the WT consortium.

255  
256 Since our engineering design is based on amino-acid cross-feeding, we hypothesized  
257 that by varying the concentrations of amino acids in the medium, we could control the  
258 degree of cooperativity among the consortium members. To test this hypothesis, we  
259 subjected the engineered bacteria in monoculture and co-culture to different  
260 concentrations of relative amino acid supplementation (Figure 3C). We measured  
261 bacterial abundance (cfu/mL) via qPCR after 24 hr and calculated cooperation factors  
262 for each condition. Overall, bacterial growth decreases for both monoculture and co-  
263 culture conditions with decreasing supplementation, as expected. Interestingly, we were  
264 effectively able to ablate cooperativity with high amino acid supplementation; in this  
265 regime, the engineered consortium behaves like the WT consortium, with monoculture  
266 growth exceeding co-culture growth. As supplementation decreased, we found that the  
267 cooperativity factor consistently increased, with the factor exceeding 1 at a  
268 supplementation level of 3  $\mu$ M. These findings are consistent with cross-feeding

269 behavior in naturally occurring microbial consortia, in which cooperativity only occurs  
270 during nutrient scarcity (Carlson et al., 2018).

271  
272 Our simulation studies showed that our engineering design could result in a consortium  
273 with a balanced population less susceptible to environmental changes. Thus, we were  
274 interested in how varying amino acid supplementation would affect population balance.  
275 To assess this, we measured relative abundances of each species in the engineered  
276 consortium (Figure 3C, lower panel) via strain-specific qPCR. We quantitated population  
277 balance using the normalized entropy measure (also called the evenness index) for the  
278 consortium. With this measure, a completely even (balanced) community would have a  
279 relative entropy of one.

280  
281 We found that the highest population evenness occurred with the highest  
282 supplementation (1000 uM.) This is likely because all the required amino acids are  
283 supplied, which reduces competition that would lower population evenness. When  
284 supplementation is decreased to intermediate levels (30 and 100 uM), the relative  
285 abundances of bacteria become less even, i.e. entropy decreases. Specifically,  
286 *Bacteroides spp.* abundance decreases dramatically, and *E. coli* and *S. Typhimurium*  
287 dominate the culture. This level of supplementation represents a “mismatched” regime,  
288 in which amino acid concentrations are high enough to support some of the species (*S.*  
289 *Typhimurium* and *E. coli*, which have the lowest amino acid requirements), but not the  
290 others (the *Bacteroides spp.*, which have higher requirements.) When amino acid  
291 supplementation is reduced further (particularly below 20 uM), the ecosystem enters a  
292 low nutrient regime characterized by increased cooperativity as described above, and  
293 population evenness increases again, almost to levels seen with the highest levels of  
294 supplementation.

295

### 296 **The Engineered Consortium Exhibits Greater Stability**

297 Our amino acid supplementation experiments demonstrated that a microbial consortium  
298 with low cooperativity can exhibit high population evenness, but can also be less stable.  
299 One measure of stability is the extent to which a system tends to reach the same end-

300 point or steady-state, even if it starts in a different initial state. Indeed, this behavior is a  
301 necessary condition for common microbial dynamical systems models to exhibit  
302 asymptotic stability (Gibson et al., 2017). To assess the stability of our consortium  
303 according to this criteria, we inoculated both WT and engineered consortia at five  
304 different starting concentrations each (Figure 4). In condition 1, all bacterial species  
305 were inoculated at the same ratios, and in conditions 2-5, we reduced one of the  
306 species' inocula by a factor of 10. We then assessed growth of each strain in co-culture  
307 over 12 hours (Figure 4A, B) via strain-specific qPCR. Both consortia reached consistent  
308 total concentrations at 12 hrs (approximately  $5 \times 10^7$  cfu/mL,  $1 \times 10^6$  cfu/mL for  
309 engineered.) However, the end-point abundances of the WT consortium members  
310 differed markedly, depending on the starting condition. In particular, for conditions 2-4,  
311 the low inoculum species remained low at 12 hrs. In contrast, the engineered  
312 consortium exhibited significantly greater consistency ( $p$ -value 0.0355) in end-point  
313 concentrations of the consortium members, regardless of the starting condition. These  
314 results demonstrate increased stability, a dynamical systems property, of the  
315 engineered consortium.

316

### 317 **Computational Analysis of *in vitro* Growth Dynamics of the Engineered Consortia** 318 **over Time Elucidate a Net Positive Interaction Network**

319 Our design created a mutually coupled bacterial consortium designed to function  
320 together, suggesting that consortium behavior is best assessed in the full assemblage,  
321 rather than through pairwise co-culture experiments. In order to investigate such  
322 behavior, we analyzed the densely sampled time-series data from our experiments  
323 using the entire consortium with different initial starting conditions (Figures 4A,4B;  
324 described in the previous section) with a dynamical systems inference approach.

325

326 Our dynamical systems approach uses a tailored model based on stochastic  
327 generalized Lotka-Volterra (gLTV) dynamics and an associated fully Bayesian machine-  
328 learning/statistical inference algorithm (Methods, Gibson and Gerber, 2018). Continuous  
329 time stochastic generalized Lotka-Volterra (gLTV) dynamics can be expressed as:

330 
$$d\mathbf{x}_{t,i,\ell} = \left( r_i \mathbf{x}_{t,i,\ell} + \sum_{j=1}^n a_{i,j} \mathbf{x}_{t,i,\ell} \mathbf{x}_{t,j,\ell} \right) dt + d\mathbf{w}_{t,i,\ell}$$

331 where  $\mathbf{x}_{t,i,\ell}$  is the abundance of microbe  $i$  at time  $t$  in experiment  $\ell$ . The parameter  $r_i$   
332 denotes the growth rate of microbe  $i$ , and  $a_{i,j}$  is the effect that microbe  $j$  has on microbe  
333  $i$ . When  $i = j$  the expression  $a_{i,i}$  is a self-limiting term and together with  $r_i$  determines  
334 the carrying capacity,  $-\frac{r_i}{a_{i,i}}$ , of microbe  $i$  if no other microbes were present. Finally,  $\mathbf{w}$  is  
335 the process disturbance term, which we assume is a Brownian motion. For inference,  
336 we discretize the continuous dynamics as described fully in Methods.

337

338 We used our method to infer growth rates and microbe-microbe interaction strengths  
339 from our time-series data (Figure 4E,F). As we described above, the WT consortium  
340 achieves an overall higher concentration of approximately  $5 \times 10^7$  versus  $1 \times 10^6$  cfu/mL  
341 for the engineered consortium. This results in different scales for the self-interaction and  
342 interaction parameters across the two consortia, so we normalized the interaction  
343 matrices by steady-state dynamics (see Methods) to render the two consortia  
344 comparable. We see that the WT consortium has several strong aggregate negative  
345 interactions, e.g., mutual negative interactions between *E. coli* and *S. Typhimurium*. In  
346 contrast, the engineered consortium has aggregate neutral interactions, aside from one  
347 strong positive interaction from *B. fragilis* to *S. Typhimurium*.

348

349 We can gain insight into the *net changes* in the quantitative structure of the synthetic  
350 microbial interaction network introduced by engineering, by subtracting the normalized  
351 WT network from the normalized engineered network, and keeping only interactions  
352 deemed significant with our inference method in at least one network. Using this  
353 analysis, we found 5 net positive and 7 net neutral interactions, confirming the ability of  
354 our engineering approach to promote cooperation in the consortium. Interestingly, since  
355 the WT interaction network shows strong competitive interactions, our model suggests  
356 that our engineering approach mostly promotes cooperatively by significantly weakening  
357 the naturally occurring competitive interactions.

358

359 The inferred network is generally consistent with our mono-culture and co-culture  
360 results. For instance, the strongest positive interaction in the engineered consortium is  
361 from *B. fragilis* to *S. Typhimurium*. Concordantly, *B. fragilis* overproduces the highest  
362 amount of its crossfed metabolite Arg, and *S. Typhimurium* is the strain that benefits  
363 most in co-culture. As another example, we did not infer any incoming positive  
364 interactions for *B. fragilis*, which is consistent with our finding that *B. fragilis* does not  
365 show improved growth in co-culture compared to monoculture. Our model inferred  
366 mutual net positive interactions between *E. coli* to *S. Typhimurium*, which are consistent  
367 with our supernatant complementation experiments.

368

369 Some aspects of the inferred model are inconsistent with the mono- and co-culture  
370 experiments, however. For instance, these experiments suggest a positive interaction  
371 from *B. fragilis* to *E. coli*, but this interaction does not appear in the inferred network.  
372 Because our model is inferred from longitudinal data, which is relatively sparse and  
373 noisy, it is not surprising that some interactions may not be detected. Further, our  
374 approach is fully Bayesian and takes into account uncertainty in both the model and  
375 measurements. This approach is by design conservative, meaning that it requires  
376 strong evidence from the data to formally detect an interaction. Thus, our approach will  
377 tend to report the strongest pre-existing or engineering induced interactions, and may  
378 miss weaker but still present interactions. Although weak interactions were enhanced by  
379 removing any amino acid supplementation in our experiments, these interactions may  
380 still fall below our threshold of detection.

381

### 382 **Simulations Based on Realistic Design Constraints Reveal Principles for Stability** 383 **in Metabolically Cooperative Microbial Consortia**

384 We used information from our experiments and data-derived microbial interaction  
385 networks to systematically study consortia stability, and gain insight into general design  
386 principles. We present these simulations with increasingly realistic design constraints  
387 and demonstrate how such constraints lead to different cooperativity regimes. For  
388 simplicity of exposition, we assume the four species have identical growth rates  $\rho$ , self-  
389 interaction terms  $\delta$  (which is always negative), and identical interactions coefficients  $\alpha$

390 (Figure 5A). In our first, and least realistic design (Figure 5B), the growth rate and self-  
391 interaction terms are kept constant, and only the positive interaction strength is  
392 increased. Under these constraints, the carrying capacity and stability of the system  
393 increases as the interaction strengths increase, up to the point of system instability.  
394 However, such a scenario is unrealistic, because on theoretical grounds, it would allow  
395 for the overall carrying capacity of the ecosystem to be arbitrarily increased. Moreover,  
396 it is inconsistent with our experimental evidence and data-derived model, which both  
397 show a lower overall carrying capacity for the engineered consortia relative to WT. This  
398 lowered carrying capacity is driven by both lower growth rates as well as increased  
399 negative autoregulation in each species, likely due to the dual burden of auxotrophy and  
400 overproduction.

401  
402 To match these realistic design constraints, we ran simulations in which increases in  
403 cooperative interactions were always accompanied by decreases in intrinsic growth  
404 rates and increases in the magnitude of negative autoregulation (Figure 5C.) We further  
405 assumed no interactions prior to engineering. In this scenario, the stability margin  
406 cannot be arbitrarily increased, and an engineering design arises, with intermediate  
407 cooperation strengths, that optimizes consortium robustness. If cooperation strengths  
408 are increased beyond this level, the consortium becomes less stable. Thus, we see that  
409 under realistic constraints, there is a trade-off between cooperativity and self-interest in  
410 the consortium, with an optimal intermediate.

411  
412 We next investigated the impact of pre-existing interactions, an important feature of  
413 naturally occurring heterogeneous bacterial species, on stability (Figure 5D.) In this  
414 case, the robustness of the consortium again cannot be arbitrarily increased, and an  
415 engineering design that optimizes consortium stability arises. However, in contrast to  
416 the case with no interactions prior to engineering (Figure 5C), the optimal cooperativity  
417 strength is higher. This reflects the fact that engineering must first push pre-existing  
418 competitive interactions toward neutrality before pushing interactions into the optimal  
419 regime for consortium stability. These results suggest qualitative design principles for

420 engineering cooperative bacterial consortia, and provide tools for future analyses of  
421 specific designs.

422

### 423 **Consortia Engineering Increases Population Balance in the Mammalian Gut in a** 424 **Diet Dependent Manner**

425 We investigated the behavior of our consortium in the mammalian gut, using gnotobiotic  
426 mice as a controlled yet sufficiently complex environment for evaluation. To investigate  
427 the role of amino acid cross-feeding *in vivo*, we altered amino acid levels in the gut by  
428 changing the animal's diet (Ravindran et al., 2016). Groups of five germfree mice were  
429 fed standard or low protein (3%) chow and gavaged with either the WT or engineered  
430 consortium (Figure 6). The consortia were allowed to colonize for 10 days, and then  
431 stool samples were collected and interrogated via qPCR with species-specific primers.  
432 The engineered consortium consistently exhibited greater population evenness in mice  
433 that were fed low protein diet compared to the three other groups (Mann-Whitney test;  
434 *p*-values: 0.02, 0.03, 0.02).

435

436 Our results show that diet influences total bacterial concentrations in both engineered  
437 and WT consortia, and each species in the consortium is affected to a different extent.  
438 For the engineered consortium, species abundances were higher by a factor of  
439 approximately 3 for *E. coli*, 8 for *S. Typhimurium*, 16 for *B. theta*, and 11 for *B. fragilis* in  
440 mice fed a standard versus a low protein diet. In the case of the WT consortium, *S.*  
441 *Typhimurium*, *B. theta* and *B. fragilis* concentrations were similarly higher on standard  
442 chow (fold changes of approximately: 10, 22, 13 respectively). WT *E. coli*  
443 concentrations were dramatically higher (fold change of approximately 51), and partially  
444 account for the greater population imbalance in the WT consortium. Interestingly, in the  
445 mice on a low protein diet, *S. Typhimurium* grew about 8-fold better in the engineered  
446 consortium compared to the WT consortium. This finding is consistent with our *in vitro*  
447 results, which indicated that engineered *S. Typhimurium* benefits most from growing in  
448 co-culture. The same trend can be observed in mice that were fed standard diet, albeit  
449 to a lesser extent.

450

451

## 452 **Discussion**

453 We have engineered a heterogeneous synthetic bacterial consortium from four different  
454 gut-derived species, and demonstrated that this consortium exhibits inducible  
455 cooperativity, with increased stability and population balance. Using data-driven  
456 dynamical systems models, we have elucidated the interaction network among  
457 consortia members and shown that our engineering strategy acts to increase  
458 cooperativity largely by neutralizing pre-existing competitive interactions. Simulations  
459 based on the derived model provide further insights into general synthetic design  
460 strategies for these systems, showing a regime of optimal cooperativity that maximizes  
461 consortium stability. Finally, we demonstrate that our engineered consortium exhibits  
462 increased population balance in the complex mammalian gut environment when  
463 induced to cooperate, with this behavior alterable by the host diet.

464

465 This work differs from previous approaches in two key aspects. First, while there have  
466 been reports of engineered multi-strain consortia (Minty et al., 2013; Zhou et al., 2015),  
467 we have engineered four different species that have relevance to gut applications.  
468 Second, previous efforts to engineer interactions via metabolite cross-feeding have  
469 relied on metabolite auxotrophies without corresponding overproduction (Mee et al.,  
470 2014; Wintermute and Silver, 2010a). Here, we selected for overproducing strains for  
471 each of the four species, applying knowledge from industrial amino acid overproduction  
472 (Becker and Wittmann, 2012).

473

474 We found that there are strong pre-existing negative interactions between WT strains  
475 (Figure 3b), which is not altogether surprising given the natural history of gut  
476 commensal bacteria. Negative interactions may include acidification (Ratzke et al.,  
477 2018), scavenging of metals or other micronutrients (Hider and Kong, 2010), and  
478 competition for carbohydrate sources, among others. In some instances, we achieved  
479 measurable positive interactions, whereas in other cases the negative interactions were  
480 neutralized. Of note, our engineered consortia growth is reduced by about 100-fold  
481 compared to the WT consortia (Figure 3 a,b). In essence, we have introduced improved



482 cooperativity into the consortium with concomitant gains in stability and population  
483 balance, at the expense of strains' individual fitness. Loss of fitness in this case is likely  
484 due to insufficient complementation by the overproducers as shown in our initial system  
485 characterization (Figure 2). Complementation could be improved in two ways: first  
486 directed evolution approaches could render a more efficient consortium, and second,  
487 we could apply rational engineering (e.g. introducing transporters or increasing  
488 overproduction) to improve cross-feeding. Genome sequencing of our mutated strains  
489 could aid in such approaches in future work.

490

491 We have created a model ecosystem that allows us to study the effects that cooperation  
492 has on microbial consortia. While microbial cooperation is found in natural habitats  
493 (Hays et al., 2015b; Ponomarova et al., 2017; Rakoff-Nahoum et al., 2016), and there  
494 are many ecological theories that attempt to explain its evolution (Nowak, 2006; West et  
495 al., 2006; Zomorodi and Segrè, 2016), there is a dearth of experimental systems to test  
496 such hypotheses. In our system, cooperation leads to improved growth of the overall  
497 synthetic consortia, but it also promotes continuing survival of each single species  
498 through improved population evenness. These two characteristics of our system make it  
499 an attractive test-bed to address questions about the evolution of cooperation, which  
500 serves both the consortia as a whole and each single species' survival.

501

502 We chose cross-feeding of amino acids as a model of cooperativity, because this  
503 approach has been well established and could readily be applied to disparate bacterial  
504 species. However, amino acids are also abundant in the animal gut and other  
505 environments, raising the possibility that background amino acids levels would simply  
506 saturate our synthetic consortium. Remarkably, our consortium demonstrated inducible  
507 cooperativity with increased population balance in our gnotobiotic mouse model (Figure  
508 6), despite the fact that the germ-free mouse gut contains amino acids from both diet  
509 and host sources. This experimental system provides a relatively controlled, but still  
510 complex environment, and allows us to readily interpret behavior of the consortia alone  
511 without having to consider interactions with a pre-existing microbiota. Of note, all of the  
512 strains we used have been shown to individually colonize conventional mice, in some

513 cases without the need for prior antibiotic treatment (Kotula et al., 2014; Riglar et al.,  
514 2017). However, our approach using amino acid crossfeeding may not translate to a  
515 mammalian gut colonized with a pre-existing microbiota. Thus, when extending our  
516 results to more complex systems, more orthologous approaches to cooperativity are  
517 likely to be necessary to avoid host interference.

518

519 Our computational approach is data-driven and phenomenological, abstracting various  
520 types of possible biological interactions (e.g., competition for nutrients, bacteriocin  
521 production, syntrophy, etc.) into quantitative pairwise interaction coefficients. This is a  
522 different modeling approach than that of many prior auxotroph-overproducer studies,  
523 which built detailed metabolic models. These models have not been shown to be  
524 reliable for diverse bacteria, such as the *Bacteroides spp.* in our consortium, in part due  
525 to limited knowledge of bacterial metabolism outside of a small number of model  
526 organisms. Moreover, as discussed, in a consortium with heterogeneous commensal  
527 gut bacteria as members, we expect there to be pre-existing interactions, many of which  
528 may not be metabolic. Thus, to gain insights into our consortium, rather than build a  
529 bottom-up metabolic model, we infer a phenomenological model from data. Our model  
530 is based on stochastic generalized Volterra-Lotka (gLTV) dynamics, which is a relatively  
531 simple model. More sophisticated models incorporate higher-order interactions or  
532 nonlinearities such as saturation effects. However, gLTV models have been shown to  
533 accurately forecast dynamics in complex host-microbial ecosystems (Bucci et al., 2016),  
534 suggesting that the relatively simple assumption of pairwise quadratic interactions may  
535 dominate higher-order and more nonlinear effects. Moreover, reliable inference from  
536 data for more complicated models is not possible given the amount of densely sampled  
537 time-series data that we could feasibly collect for the present study.

538

539 Overall, we have demonstrated a design, build and test cycle, applicable to engineering  
540 microbial consortia that function in the mammalian gut. There is currently interest in  
541 developing living bacterial diagnostics and therapeutics for human diseases. The first  
542 approach has been to attempt to transfer an uncharacterized microbiota, i.e., fecal  
543 microbiota transplants (Boyle, 2015). Subsequently, there have been efforts to

544 assemble defined collections of naturally occurring commensal bacteria (Atarashi et al.).  
545 While these approaches may work for some diseases, we could anticipate a need for  
546 precise and controllable behavior of therapeutics, which will require synthetic biology.  
547 Our results help to close this gap, providing new insights into the design principles  
548 needed to engineer robust and heterogeneous bacterial consortia.

549

550

551

552

553

554

555

556

557

## 558 **Acknowledgement**

559 We thank Eli Bogart for computational advice; Laurie Comstock for providing *B. fragilis*  
560 638R and helpful advice on *Bacteroides* handling. This project was funded by the  
561 Defense Advanced Research Program Agency (DARPA BRICS HR0011-15-C-0094),  
562 NIH T32 HL007627 (to T.G.) and The Wyss Institute for Biologically Inspired  
563 Engineering. D.T.R. is supported by a Human Frontier Science Program Long-Term  
564 Fellowship and a National Health and Medical Research Council (NHMRC) RG Menzies  
565 Early Career Fellowship from the Menzies Foundation Australia.

566

## 567 **Author Contributions**

568 Conceptualization, J.C.W, P.A.S, G.K.G; Methodology, M.Z., T.G., J.O., G.K.G.;  
569 Software, T.G.; Formal Analysis, M.Z., T.G.; Investigation, M.Z., J.O., A.S., T.G., N.D.,  
570 K.L.; Resources, L.B., P.A.S., G.G.; Writing – Original Draft, M.Z., T.G.; Writing –  
571 Review & Editing, B.B.H., D.T.R, P.A.S., G.K.G.; Visualization, D.T.R., B.B.H.;  
572 Supervision, D.T.R., B.B.H., L.B., J.C.W., G.K.G., P.A.S.; Funding Acquisition, D.T.R.,  
573 J.C.W., P.A.S., G.K.G.

574

575 Financial Interests

576 G.K.G. is a shareholder and member of the Strategic Advisory Board of Kaleido  
577 Biosciences, and shareholder and member of the Scientific Advisory Board of Consortia  
578 Rx; neither company provided funding for this work.

579

580

581

582

583

584

585 **Methods**

586 **Auxotroph engineering**

587 For auxotroph generation in the *E. coli* NGF-1 strain we introduced multiple knockouts  
588 using sequential P1 transduction (Thomason et al., 2007) from the Keio knockout  
589 collection (Baba et al., 2006). Flip-out of kanamycin cassettes was done using pCP20  
590 (Cherepanov and Wackernagel, 1995). In brief, for P1 transduction we prepared phage  
591 by diluting an overnight culture of the donor strain 1:100 LB with 0.2% glucose, 5 mM  
592 CaCl<sub>2</sub> and 25 mM MgCl<sub>2</sub> and incubated for 1-2 hours at 37 °C until slightly turbid. We  
593 then added 40 µL P1 lysate and continued growth for 1-3 h at 37 °C while shaking until  
594 lysed. Lysate was then filtered with a 20 µm sterile filter and stored in the fridge. For  
595 transduction, we harvested 2 mL overnight culture of recipient strain and re-suspended  
596 in 2 mL LB with 5 mM CaCl<sub>2</sub> and 100 mM MgSO<sub>4</sub>. We then mixed 100 µL donor lysate  
597 with 100 µL recipient, incubated 30 min at 37 °C and added 200 µL sodium citrate (1 M,  
598 pH 5.5) and 1 mL LB and incubated for another 1 hr at 37 °C. Cells were harvested, re-  
599 suspended in 100 µL LB with 100 mM sodium citrate and plated on LB Kan plates (75  
600 µg/mL). The transduced kanamycin cassette was then removed using pCP20 according  
601 to protocol. We transformed pCP20 via electroporation and transformants were selected  
602 on LB agar plates supplemented with 100 µg/mL carbenicillin grown at 30 °C. Single  
603 colonies were re-streaked on LB without drugs and incubated for 10 hours at 42 °C.  
604 From there, single colonies were re-streaked on LB plates without drugs and grown  
605 overnight at 37 °C. Colonies were checked for Carbenicillin, and Kanamycin sensitivity

606 and further confirmed via PCR at respective loci. This procedure was repeated until all  
607 knockouts were introduced.

608  
609 Engineering of *S. Typhimurium* LT2 required generation of single knockout strains that  
610 contained pKD46 integrated into the genome, which allowed for linear DNA integration  
611 using lambda red recombination (Cherepanov and Wackernagel, 1995). We then  
612 introduced the knockouts into the *S. Typhimurium* strain through sequential P22  
613 transduction and pCP20 flipout analogous to *E. coli* engineering. Single knockout  
614 strains were generated by PCR amplifying a Kanamycin resistance cassette from  
615 pKD13 generating linear fragments that contained upstream and downstream homology  
616 to the gene of interest and the kanamycin cassette with FRT sequences. Fragments  
617 were introduced via electroporation and selected on LB agar plates supplemented with  
618 50 µg/mL Kanamycin. Sequential P22 transduction and pCP20 flip-out was essentially  
619 performed as described above for P1 transduction but lysis was done overnight.

620  
621 For knockout generation of both *B. theta* and *B. fragilis*, we used pExchange KO vectors  
622 as described (Mimee et al., 2015). Briefly, we introduced 750 bp flanking regions for  
623 genes of interest adjacent to each other into the vector. The vector contains an  
624 erythromycin resistance positive marker and a thymidine kinase as counter selection  
625 marker. Cloning was done in pir<sup>+</sup> *E. coli* strains and vectors were transferred to MFDpir  
626 for conjugation (Ferrières et al., 2010). Conjugation was done according to protocol with  
627 minor changes. In brief, five drops of overnight culture of *E. coli* donor was inoculated in  
628 LB supplemented with 300 µM Diamino pimelic acid (DAP) and five drops of recipient  
629 overnight culture was inoculated in 50 mL basal media. Both cultures were grown for  
630 about 2 hr (*E. coli* aerobically, *Bacteroides spp.* anaerobically) until *E. coli* culture was  
631 well turbid and *Bacteroides* culture just slightly turbid. Subsequently, 9 mL recipient and  
632 3 mL donor were combined and spun down for 10 min at 4000 rpm together. The pellet  
633 was re-suspended in 100 µL fresh basal media with 300 µM DAP and pipetted on basal  
634 media agar plates without cysteine and supplemented with 300 µM DAP. The cells were  
635 incubated at 37 °C aerobically face up for up to 20 hr, scraped off and re-suspended in  
636 10% glycerol. Dilutions were plated on basal-agar plates supplemented with 10 µg/mL

637 erythromycin and incubated at 37 °C anaerobically for 2-3 days. Single colonies were  
638 re-streaked in the presence of erythromycin and grown for another 2 days. 10 single  
639 colonies were inoculated in basal media without drug and grown overnight. 500 µL of  
640 each culture was mixed, spun down and re-suspended in 10% glycerol. We then plated  
641 different dilutions on basal media plates supplemented with 5-fluoro-2-deoxy-uridine  
642 (FuDR) (200 µg/mL) and incubated at 37 °C anaerobically for 3 days. Knockouts were  
643 verified via PCR. This procedure was repeated multiple times to obtain the multiple  
644 auxotroph strains.

645

### 646 **Overproducer selection**

647 Overproducers were generated by selecting for mutants that could grow on minimal  
648 media agar plates supplemented with anti-metabolites (*E. coli*: 5 mg/mL Norleucine for  
649 Met overproduction; *S. Typhimurium*: > 0.7 mg/mL beta-(2-thiazolyl)-DL-alanine for His  
650 overproduction; *B. theta*: 50 µg/mL 4-methyl tryptophan for Trp overproduction; *B.*  
651 *fragilis*: 80 µg/mL Canavanine for Arg overproduction). Single colonies that showed  
652 halos were re-streaked and overproduction was measured using a bioassay. In brief, for  
653 screening of overproducing mutants the isolated strains were grown overnight at 37 °C  
654 shaking aerobically (for *E. coli* and *S. typhimurium*) or anaerobically without agitation  
655 (for *Bacteroides spp.*). Supernatant was harvested, diluted 1:1 with fresh media, and *E.*  
656 *coli* auxotrophs were inoculated and their growth was recorded after 24 hr. For *E. coli*  
657 NGF-1 overproducers, we used a *S. Typhimurium* auxotroph instead, since its colicin  
658 production prevented the *E. coli* biosensor from growing. Confirmed overproducers  
659 were further quantified using LC-MS.

660

### 661 **LC-MS for Overproduction Measurements**

662 To quantitate amino acid levels in overproducer supernatants, a standard curve was  
663 obtained using freshly prepared amino acid standards dissolved in growth media (1mM,  
664 500 uM, 100 uM, 50 uM, 10 uM of L. Methionine, L/Histidine, L-Tryptophan, L-Arginine  
665 each). To prepare for HPLC-MS analysis, 0.5 mL sample or standard were added to  
666 1.5 mL ice-cold methanol and incubated on ice for 10 min. The mixture was centrifuged  
667 for 5 min at 15,000 rpm and 500 µL supernatant was vacuum concentrated and re-

668 suspended in 50  $\mu$ L methanol. Samples were kept on ice or at 4°C. HPLC-MS analysis  
669 of standards and extracts was carried out using an Agilent 1260 Infinity HPLC system  
670 equipped with an Agilent Eclipse Plus C18 (100  $\times$  4.6 mm, particle size 3.5 mm, flow  
671 rate: 0.3 mL/min, solvent A: dd.H<sub>2</sub>O/0.1% (v/v) formic acid, solvent B: acetonitrile,  
672 injection volume: 4 mL) connected to an Agilent 6530 Accurate-Mass Q-TOF  
673 instrument. The following gradient was used (time/min, %B): 0, 0; 0.5, 0; 14, 100; 19,  
674 100; 20, 0, 25, 0. The mass spectrometer was operated in positive mode and the  
675 autosampler was kept at 4°C. After HPLC-MS analysis, extracted ion current (EIC)  
676 peaks were automatically integrated using the MassHunter Workstation Software  
677 (version: B.07.00). A plot of peak area versus amino acid concentration was used to  
678 generate a linear fit.

679

## 680 **Sequencing**

681 Bacterial cultures were prepared in rich media (basal for *Bacteroides spp.* and LB for *E.*  
682 *coli* and *S. Typhimurium*). Genomic DNA (gDNA) extraction was performed using the  
683 Wizard Genomic DNA Purification Kit (Promega) according to protocol. The extracted  
684 gDNA was sheared using Covaris DNA Shearing, and the library was prepared using  
685 Kapa Biosystem DNA Hyper Prep NGS Library (Dana Faber Core MBCFL Genomics).  
686 Sequencing was performed on the Illumina MiSeq instrument, with the 150 bp paired  
687 End (PE150) reagents. Sequences were analyzed for SNPs using Geneious software  
688 and published genome sequences (*E. coli*: CP016007.1; *S. typhimurium*: NC\_003197;  
689 *B. theta*: AE015928; *B. fragilis*: NC\_016776) (Table S1).

690

## 691 **Growth and Media Conditions**

692 All basal media and co-culture media was pre-incubated for at least 24 hr anaerobically  
693 before use. *Bacteroides spp.* were inoculated from glycerol stock into basal media,  
694 grown overnight and 400  $\mu$ L was inoculated in 5 mL basal and grown 2 hr anaerobically.  
695 Cells were spun down, washed twice in PBS and diluted in growth media as described  
696 for each experiment in Results. *E. coli* and *S. Typhimurium* were inoculated from  
697 glycerol stock into LB and grown overnight at 37 °C while shaking. 100  $\mu$ L of culture  
698 was then inoculated into pre-incubated LB and grown anaerobically for 2 hr, diluted,

699 washed in PBS and diluted into co-culture media as described. Co-culture media  
700 consisted of modified M9 salts (0.2 g/L Na<sub>2</sub>HPO<sub>4</sub>, 90 mg/L KH<sub>2</sub>PO<sub>4</sub>, 30 mg/L NH<sub>4</sub>Cl, 15  
701 mg/L NaCl), 1 mM MgSO<sub>4</sub>, 10 µg/mL heme, 0.1 mM CaCl<sub>2</sub>, 1 µg/mL Niacinamide,  
702 vitamin B12 and thiamine, 400 µg/mL L-cysteine, 0.3% bicarbonate buffer, 2.5 ng/mL  
703 vitamin K, 2 µg/mL FeSO<sub>4</sub>\*7H<sub>2</sub>O and carbon sources and amino acid supplementation  
704 as described in Results.

705

### 706 **Multiplex qPCR**

707 We designed strain specific primer/probe-fluorophore pairs according to IDT protocol  
708 (Table S2). We chose strain specific genes by multiple genome alignment between the  
709 strain of interest, the other consortia members and closely related strains using Mauve  
710 (Darling et al., 2004). Multiplex qPCR was used to quantify each strain in co-culture by  
711 using a standard curve obtained by plating late log phase cultures grown in rich media.  
712 In brief, each strain was grown from overnight culture for ~5 hours until about OD of 1.  
713 Cells were then counted by plating. Cultures were mixed, diluted and frozen at -80 °C  
714 for use as standard curve. Samples were diluted 1:10 in ddH<sub>2</sub>O and snap-frozen in  
715 liquid nitrogen and stored at least overnight at -80 °C. Growth curve and sample were  
716 both thawed together and prepared in a 5 µL Primetime Mastermix (IDT) with 1 µL  
717 Primer/Probe mixture (final concentrations: 100 nM for primers and 50 nM for probes).  
718 The qPCR was run with the following program: 20 min at 98 µC (to boil the cells and  
719 denature gDNA), followed by 40 cycles of 60 °C and 98 °C.

720

### 721 **Calculation of Normalized Entropy (Pielou's Evenness) and Hellinger Distance**

722 Normalized entropy (Pielou's evenness) was calculated according to the given formula:

723

$$724 \quad \text{Pielou's Evenness Index} = \frac{-\sum_{i=1}^4 p_i * \ln(p_i)}{\ln(S)}$$

725

726 Where  $p_i$  refers to the population ratio of a given strain in the consortium of four strains.

727 S is the number of species.



728 Hellinger distance was used as a metric for comparing consortia relative abundances.  
729 We computed Hellinger distances between different starting conditions in WT and  
730 engineered strains using the formula:

731

$$732 \quad \text{Hellinger distance} = \frac{1}{\sqrt{2}} \sqrt{\sum_{i=1}^4 (\sqrt{p_i} - \sqrt{q_i})^2}$$

733 Where  $p_i$  and  $q_i$  are the ratios of each strain in the consortium in two different conditions.

734

735

### 736 **Pairwise Supernatant Experiment**

737 Overproducers and WT strains were grown overnight anaerobically at 37 °C in co-  
738 culture media and supernatant was harvested and sterile filtered. Auxotrophs were  
739 prepared as described in **Media and Growth conditions** and inoculated in media that  
740 contained 50% fresh co-culture media and 50% spent supernatant. OD600 was  
741 measured after 24 hr growth anaerobically at 37 °C.

742

### 743 ***In vivo* Experiments**

744 Adult (6-8 weeks) male Swiss Webster germ free mice bred in house at the  
745 Massachusetts Host-Microbiome Center were used. Animals were fed either on  
746 standard chow in the facility for the entire experiment, or on low-protein diet (3% custom  
747 diet, envigo, doubly irradiated) beginning 10 days prior to the experiment and continuing  
748 for its duration. To prepare bacteria for gavage, we grew each strain to mid-log phase,  
749 plated for counting and snap-froze aliquots. For gavage, aliquots were thawed, spun  
750 down, combined to achieve concentrations of approximately  $10^7$  per bacteria per  
751 gavage, and re-suspended in 200  $\mu$ L 1x PBS with 0.05% L-cysteine for gavage. After  
752 gavage, mice were transferred to Optimice cages and maintained gnotobiotic for 10  
753 days. Fecal samples were collected prior gavage and at 10 days, and snap-frozen for  
754 storage at -80 °C.

755

### 756 **Molecular Analysis of *in vivo* Samples**

757 DNA was extracted from fecal samples using the Zymobiotic 96 DNA Kit with the  
758 following modification: we omitted the silicon-ATM-HRC wash. Cells were lysed in a  
759 bead beater at speed 20 for 10 min, plates were turned and lysed for another 10 min at  
760 the same speed. We added an additional 3 min incubation step for Binding Buffer and  
761 additional 5 min incubation steps when transferring to Zymo-Spin-I-96-Z plates. Elution  
762 was done in 50  $\mu$ L ZymoBIOMIC DNase/RNase Free Water.

763

764 Direct multiplex probe-based qPCR was done on extracted DNA samples as described  
765 above. For standard curves, we used plated overnight cultures spiked into germfree  
766 fecal samples and extracted them as described above.

767

### 768 **Synthetic simulations of deterministic microbial dynamics in the presence of a** 769 **disturbance**

770 For the synthetic results in Figure 1 and Figure 5, we used the following (deterministic)  
771 generalized Lotka-Volterra (gLTV) dynamics with a constant disturbance  $d$

$$772 \quad \frac{dx_{k+1,i}}{dt} = x_{k,i} \left( r_i + \sum_{j=1}^4 a_{i,j} x_{k,j} \right) + d_i$$

773 The corresponding first order Euler integration of these dynamics with step size  $\Delta_k$  is as  
774 follows

$$775 \quad x_{k+1,i} = x_{k,i} + x_{k,i} \left( r_i + \sum_{j=1}^4 a_{i,j} x_{k,j} \right) \Delta_k + d_i \Delta_k.$$

776 For the simulations to generate Figure 1, the growth rate vector, interaction matrix, and  
777 disturbance vector for the non-interacting consortia are

$$778 \quad r = \begin{bmatrix} .3 \\ 6 \\ 9 \\ 12 \end{bmatrix}, \quad A = \begin{bmatrix} -2 & 0 & 0 & 0 \\ 0 & -2 & 0 & 0 \\ 0 & 0 & -2 & 0 \\ 0 & 0 & 0 & -2 \end{bmatrix}, \quad \text{and} \quad d = \begin{bmatrix} 0 \\ -5.3 \\ 0 \\ 0 \end{bmatrix}.$$

779 The growth rate vector, interaction matrix, and disturbance vector for the cooperative  
780 community are then as follows

781 
$$r = \begin{bmatrix} .3 \\ 6 \\ 9 \\ 12 \end{bmatrix}, \quad A = \begin{bmatrix} -2 & 0.5 & 0 & 0.5 \\ 0 & -2 & 0 & 0.5 \\ 0 & 0.2 & -2 & 0 \\ 0.2 & 0 & 0.2 & -2 \end{bmatrix}, \quad \text{and} \quad d = \begin{bmatrix} 0 \\ -5.3 \\ 0 \\ 0 \end{bmatrix}.$$

782 Two simulation were performed for both the non-interacting and the cooperative  
 783 community: one simulation without the disturbance present, and then the subsequent  
 784 simulation with the disturbance present.

785  
 786 For the simulations to generate Figure 5, the parameterization and simulation  
 787 parameters are as specified in the figure. The robustness margin was calculated as the  
 788 largest value of  $\kappa$  for which the disturbance vector

789 
$$d = \begin{bmatrix} 0 \\ -\kappa \\ 0 \\ 0 \end{bmatrix}.$$

790 can be applied to the dynamics without any of the  $x_i$  becoming  $<0.01$  in abundance (i.e.,  
 791 without any of the species going extinct during the simulation). For all synthetic results  
 792 shown in Figures 1 and 5, the step size was  $\Delta_k = 0.005$  for a total of 3000 steps. For  
 793 generating Figure 5, the initial condition for all the species was an abundance of 2.

794

### 795 **Bayesian dynamical systems inference**

796 Our dynamical systems model and associated inference algorithm is a version of our  
 797 previously published method (Gibson and Gerber, 2018) that we have customized for  
 798 this study. Briefly, our model is based on continuous time stochastic gLV dynamics as  
 799 described in Results. We approximate these dynamics with a first order Euler  
 800 integration of step size  $\Delta_{k,\ell}$

801 
$$\mathbf{x}_{k+1,i,\ell} = \mathbf{x}_{k,i,\ell} + \mathbf{x}_{k,i,\ell} \left( \mathbf{r}_i + \sum_{j=1}^4 \mathbf{a}_{i,j} \mathbf{x}_{k,j,\ell} \right) \Delta_{k,\ell} + \sqrt{\Delta_{k,\ell}} (\mathbf{w}_{k+1,i,\ell} - \mathbf{w}_{k,i,\ell})$$

802 Our model is fully Bayesian, with the inference goal being to learn the posterior  
 803 probability distribution over both the model parameters as well as the qualitative  
 804 interaction structure graph. To model the interaction structure graph, we use indicator  
 805 variables  $\mathbf{z}_{i,j}$ , which indicate the presence or absence of the edge from species  $i$  to  $j$  in  
 806 the graph. The resulting conditional distribution for dynamics is then:

$$\begin{aligned} 807 \quad & \mathbf{x}_{k+1,i,\ell} \mid \mathbf{x}_{k,[n],\ell}, \mathbf{r}, \mathbf{a}, \mathbf{z}, \mathbf{v}_i^w \\ 808 \quad & \sim \text{Normal} \left( \mathbf{x}_{k,i,\ell} + \mathbf{x}_{k,i,\ell} \left( \mathbf{r}_i + \mathbf{a}_{i,i} \mathbf{x}_{k,i,\ell} + \sum_{j \neq i} \mathbf{a}_{i,j} \mathbf{z}_{i,j} \mathbf{x}_{k,j,\ell} \right) \Delta_{k,\ell}, \Delta_{k,\ell} \mathbf{v}_{i,\ell}^w \right) \end{aligned}$$

809 Where  $\mathbf{v}_{i,\ell}^w$  is the variance for the Brownian motion. Our measurements of microbial  
810 abundances are captured by the observed variable  $\mathbf{y}$ . We introduce an auxiliary variable  
811  $\mathbf{q}$  that enables efficient inference of a relaxed system (see Gibson and Gerber, 2018 for  
812 details):

$$\begin{aligned} 813 \quad & \mathbf{q}_{k,i,\ell} \mid \mathbf{x}_{k,i,\ell} \sim \text{Normal}(\mathbf{x}_{k,i,\ell}, \mathbf{v}^q) \\ 814 \quad & \mathbf{q}_{k,i,\ell} \sim \text{Uniform}[0, L) \\ 815 \quad & \mathbf{y}_{k,i,\ell} \mid \mathbf{q}_{k,i,\ell} \sim \text{Normal}_{\geq 0}(\mathbf{q}_{k,i,\ell}, \mathbf{v}_{k,i,\ell}^y) \end{aligned}$$

816 We estimate the measurement variance  $\mathbf{v}_{k,i,\ell}^y$  directly from qPCR technical replicates,  
817 obtaining  $L = 10^{10}$ , and  $\mathbf{v}^q = 10^6$ . The prior probability distributions for the indicator  
818 variables, the growth rates, and the interactions terms as defined below:

$$\begin{aligned} 819 \quad & \mathbf{z}_{i,j} \sim \text{Bernouli}(0.5) \\ 820 \quad & \mathbf{r}_i \mid \mathbf{v}^r \sim \text{Normal}(0, \mathbf{v}^r) \\ 821 \quad & \mathbf{a}_{i,j} \mid \mathbf{v}^a \sim \text{Normal}(0, \mathbf{v}^a) \end{aligned}$$

822 Note that our prior for  $\mathbf{z}$ , the indicator variables for presence or absence of interaction  
823 edges is set to indicate maximum uncertainty, e.g., no *a priori* assumption about the  
824 presence or absence of an interaction. The variance parameters in our model that are  
825 not *a-priori* fixed or estimated from technical replicates have the following conjugate  
826 priors

$$\begin{aligned} 827 \quad & \mathbf{v}^r \sim \text{Inv} - X^2(\eta_r, \theta_r) \\ 828 \quad & \mathbf{v}^a \sim \text{Inv} - X^2(\eta_a, \theta_a) \\ 829 \quad & \mathbf{v}^w \sim \text{Inv} - X^2(\eta_w, \theta_w) \end{aligned}$$

830 Our parameterization of the  $\text{Inv} - X^2$  is as follows

$$831 \quad f(x; \eta, \theta) \triangleq \frac{(\theta\eta/2)^{\eta/2} \exp\left[-\frac{\eta\theta}{2x}\right]}{\Gamma(\eta/2) x^{1+\eta/2}}$$

832 which is sometimes referred to as the Scale –  $\text{Inv} - X^2$  distribution, because it has two  
833 parameters, number of degrees of freedom  $\eta$ , and scale parameter  $\theta$ . In our model

834  $\eta_r, \eta_r, \eta_r = 1$  with  $\theta_r = 1$ ,  $\theta_a = 10^{-10}$ , and  $\theta_w = 10^6$ , specifying relatively diffuse priors. A  
835 compact representation of our model is shown in Supplemental Figure 1a with an  
836 accompanying graphical model with plate notation in Supplemental Figure 1b

837

838 We perform model inference using a custom Markov Chain Monte Carlo (MCMC)  
839 algorithm. Almost all variables in the model can be updated with Gibbs or collapsed  
840 Gibbs sampling, with the exception of  $\mathbf{q}$  and  $\mathbf{x}$ . Sampling of the auxiliary variables and  
841 latent trajectories require Metropolis-Hastings (MH) steps. For  $\mathbf{q}$ , the MH proposal is  
842 based on a Generalized-Linear Model approximation. For  $\mathbf{x}$ , we use a one time-step  
843 ahead proposal that is essentially the forward pass of a Kalman filter, see Supplemental  
844 Figure 1c and (Gibson and Gerber, 2018). Inference was performed with 6,000 MCMC  
845 steps where the first 1,000 steps are discarded (burn in).

846

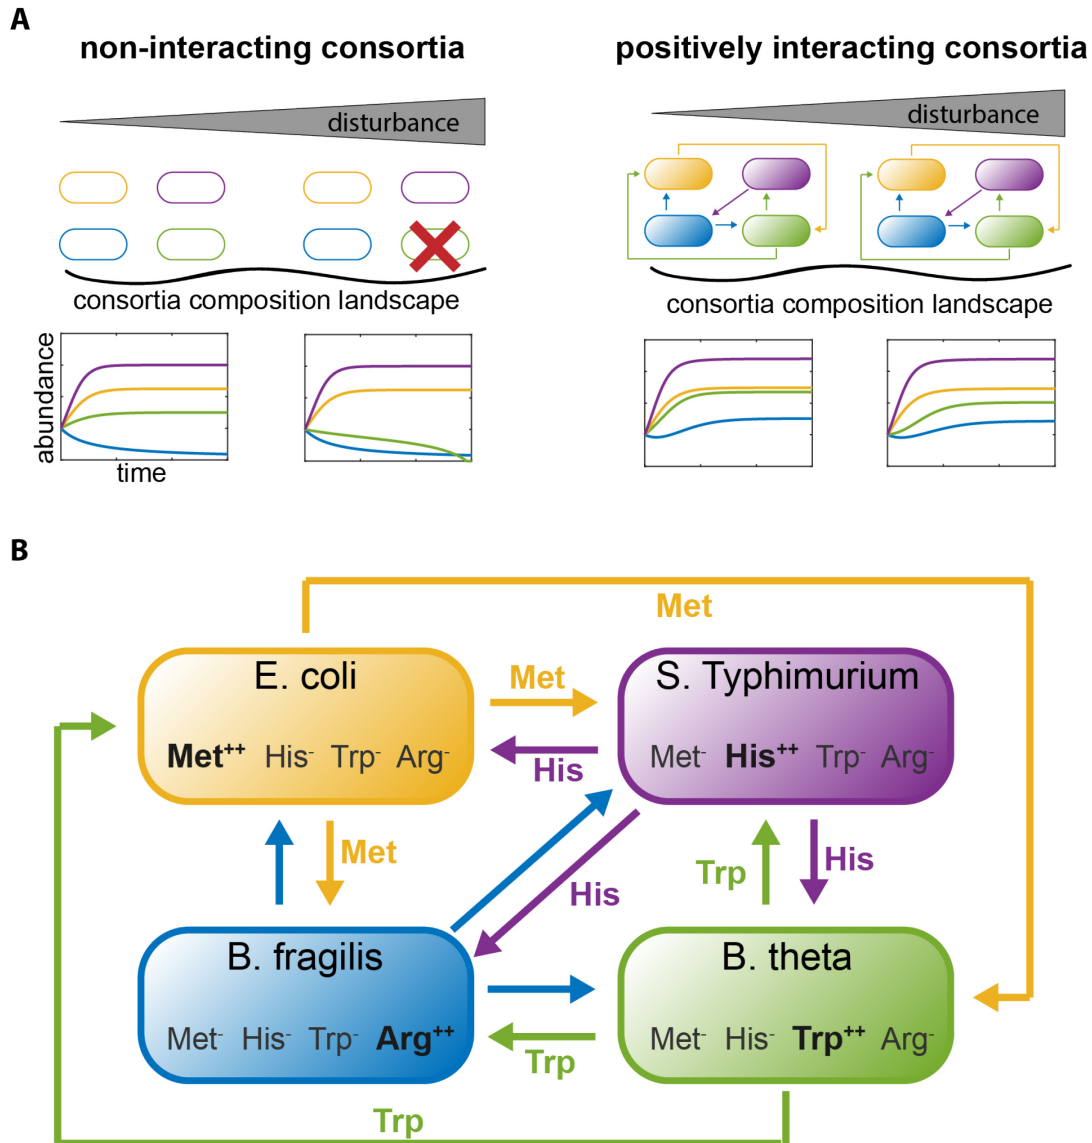

847

848

849

850

851

852

853

854

855

856

857

**Figure 1 Engineering positive interactions in a microbial consortia introduces resilience to disturbances.** (A) Simulations show increased stability in consortia with positive interactions. In a non-interacting consortia, disturbances can lead to dramatic changes in consortia composition; in this example, the disturbance causes one of the strains to die out. Introducing positive interactions among the consortia strains increases stability in the presence of disturbances. (B) Our engineering design, which introduces mutual positive interactions by cross-feeding metabolites. Each strain was knocked out for three amino acid biosynthesis pathways and mutated to overproduce one amino acid. Thus, four amino acids L-methionine (Met), L-histidine (His), L-tryptophan (Trp) and L-arginine (Arg) are cross-fed between the four strains.

858

859

a.

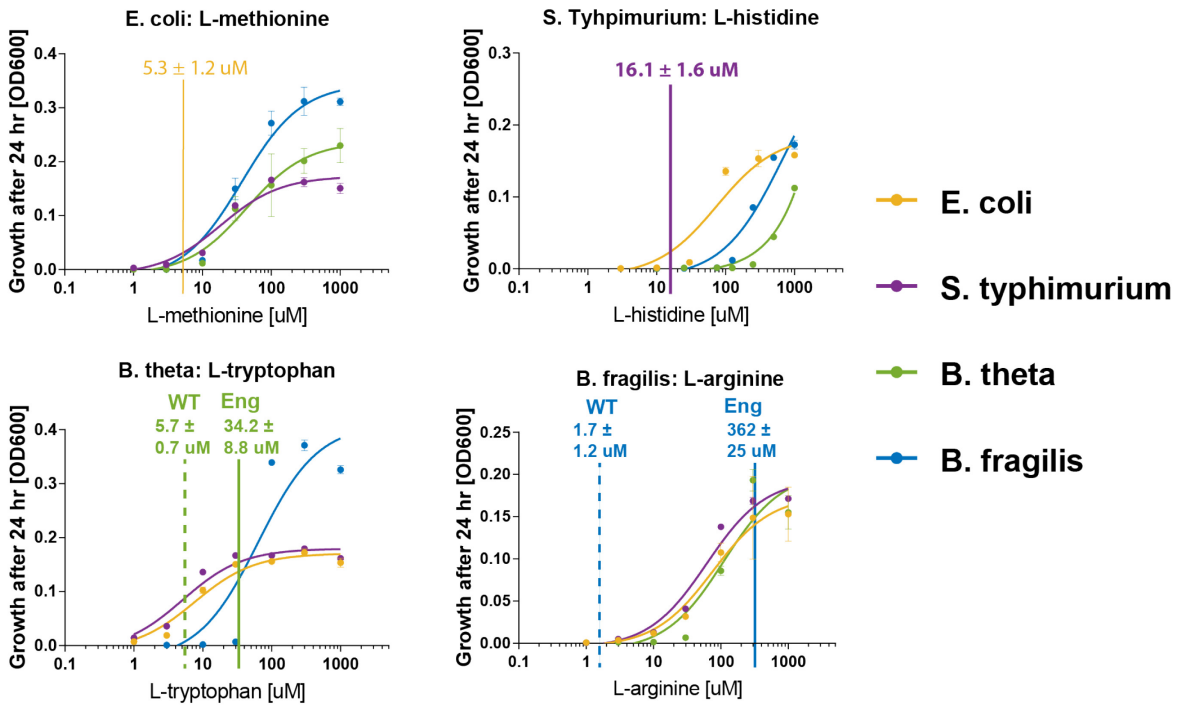

b.

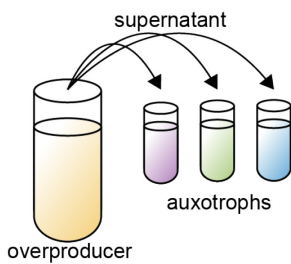

c.

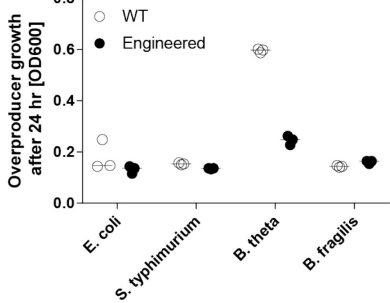

d.

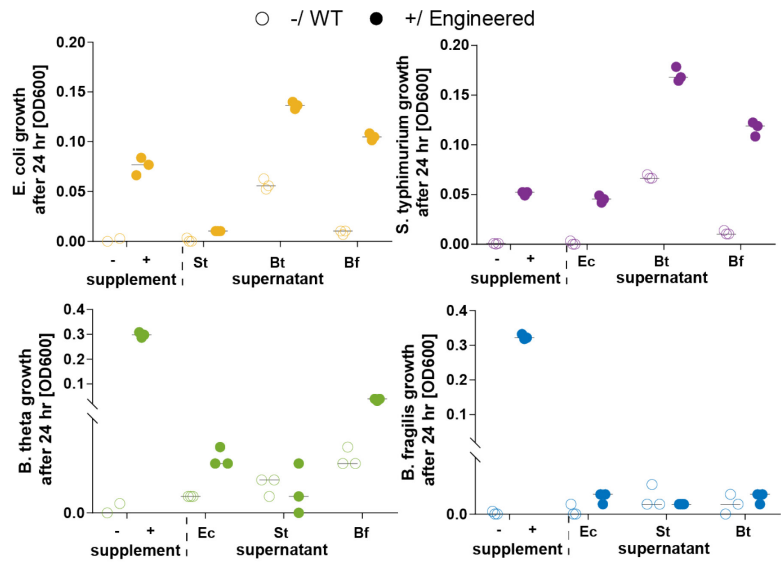

860

861

862

863

**Figure 2 Characterization of auxotroph requirements and overproduction capabilities in a 4-species consortium. a.** Growth response with indicated

864 overproduction. Each auxotroph was grown in media supplemented with varying  
865 concentrations of one amino acid and saturating concentration of the two others.  
866 Depicted is the average of three biological replicates; error bars indicate standard  
867 deviation. A sigmoidal curve was fit using GraphPad Prism 7. Overproduction  
868 (horizontal lines) falls largely within requirement values. **b.** Cross-feeding capabilities of  
869 each strain were assessed by testing for rescue of auxotrophs in supernatants obtained  
870 from overproducers. **c.** Growth of overproducers after 24 hr, at which point supernatant  
871 was collected for cross-feeding experiment. Overproduction does not affect growth with  
872 the exception of *B. theta* (3-fold reduction). Shown are three biological replicates with  
873 median indicated as horizontal line. **d.** Growth of auxotrophs with and without amino  
874 acid supplementation and in supernatant of engineered overproducers and WT  
875 equivalents. Shown are three biological replicates with median indicated as horizontal  
876 lines. Except for *B. fragilis*, all auxotrophs can be rescued to varying degrees.

877

878

879

880

881

882



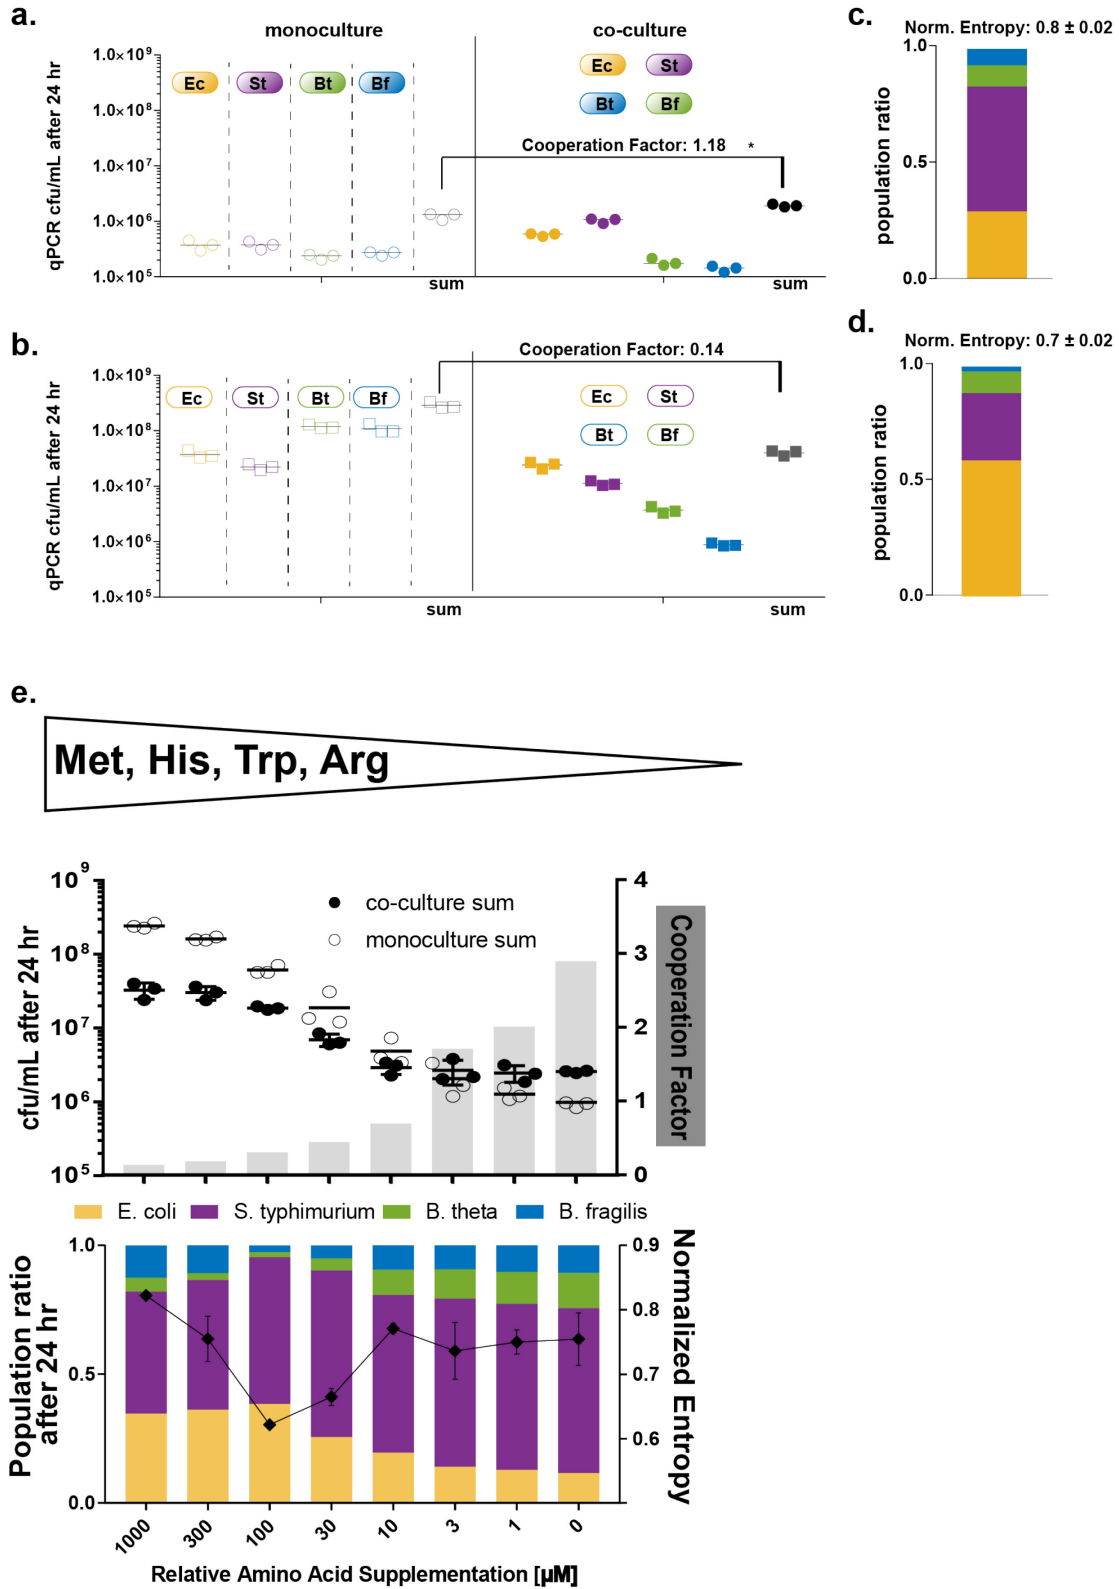

883

884 **Figure 3 Engineering introduces increased cooperativity manifested in population**

885 **balance. a./b.** Growth of engineered (a.) and WT (b.) mono cultures and co-culture

886 grown without supplementation was recorded after 24 hr as qPCR cfu/mL estimates.  
887 Shown are three replicates with median indicated. For engineered strains co-culture  
888 reaches higher cfu/mL than sum of monocultures quantified by cooperation factor. \*sum  
889 in co-culture in engineered strains is significantly larger than sum in monocultures  
890 (Mann-Whitney test;  $p$ -value: 0.0071) **c./d.** Population ratios and calculated balance  
891 factor for engineered and WT co-cultures. Balance for engineered strains is higher than  
892 for WT strains. **e.** Supplementation titration experiment. Engineered consortia co-culture  
893 and mono cultures were subjected to a range of amino acid supplementation and was  
894 analyzed after 24 hr via qPCR. Upper panel: sum of monocultures growth (empty  
895 circles) and co-culture growth (filled circles) and calculated cooperation factor (grey  
896 bars). Shown are three replicas with median indicated as black line. Cooperation  
897 increases with decreasing supplementation. Lower Panel: Population ratios of co-  
898 cultures as function of supplementation. Shown is the mean of three replicas. At high  
899 supplementation, evenness is high, then drops at intermediate levels and rises again at  
900 lower levels. Cooperation and evenness co-vary.

901  
902  
903  
904  
905  
906  
907  
908  
909  
910

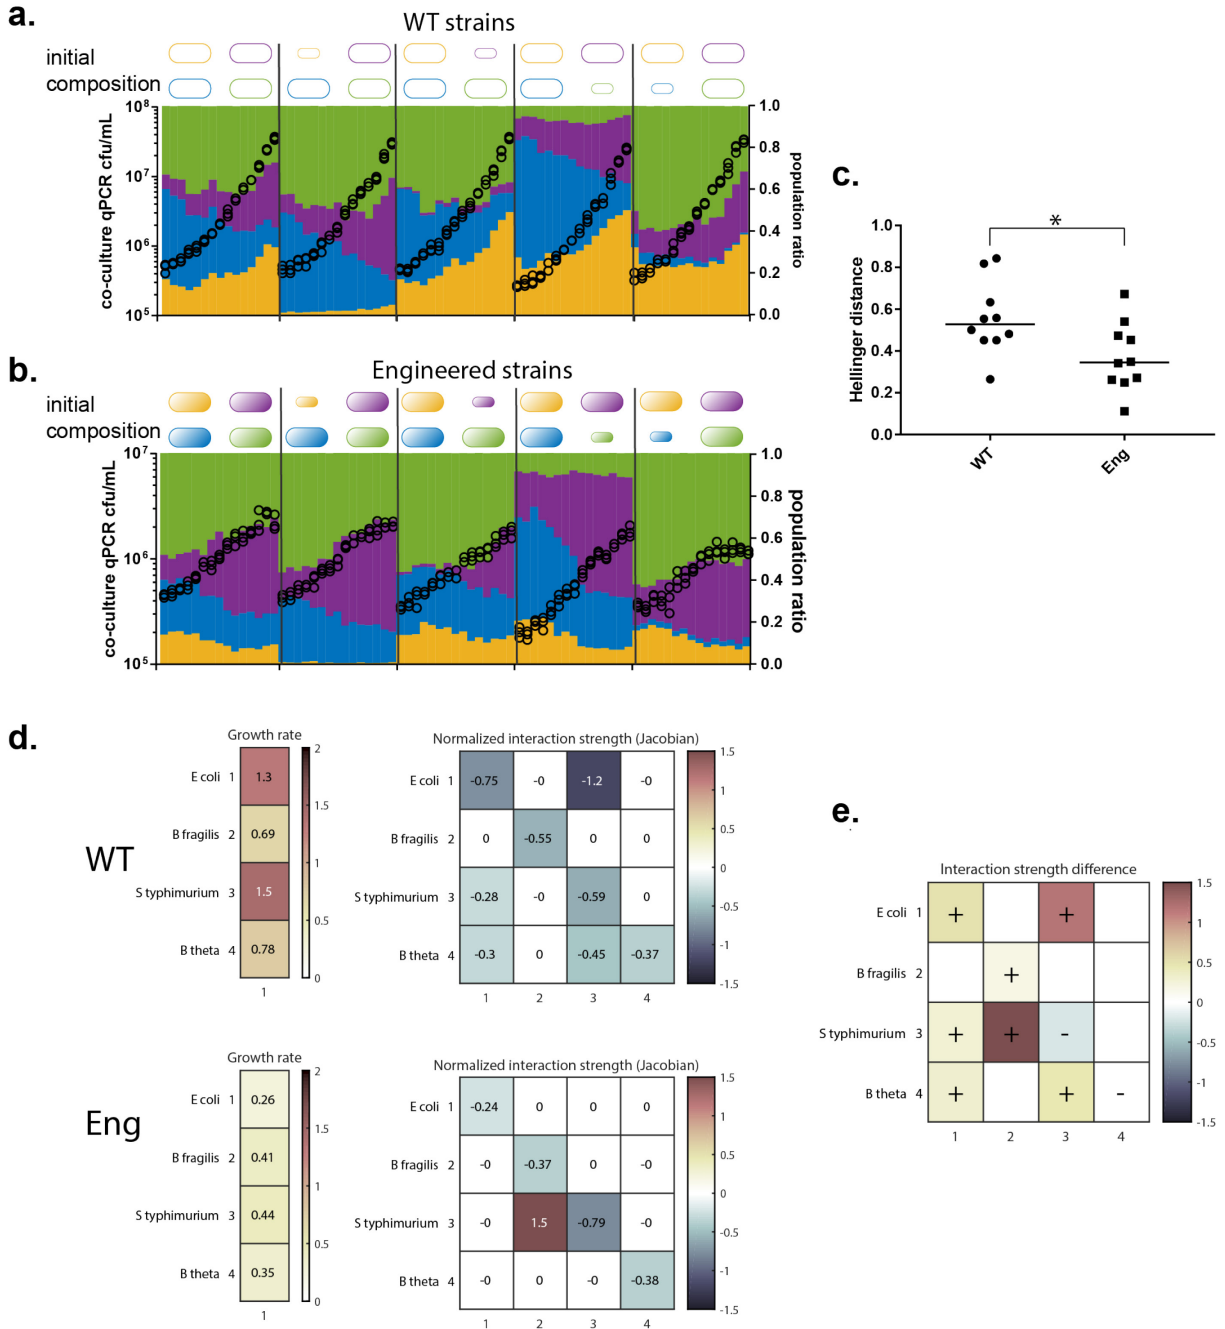

911

912 **Fig 4 Engineered consortia exhibits net positive interaction structure and**  
 913 **increased stability.** **a.** We inoculated WT and engineered consortia in media without  
 914 amino acid supplementation and followed growth over time. Starting inocula varied to  
 915 mimic external perturbations. Each strain was inoculated at the same ratio (condition 1)  
 916 and then each one dropped down by 1:10 (condition 2-5). Total bacterial abundance  
 917 (black dots) and relative abundances (colored bars) for each starting condition for WT  
 918 and engineered strains in sequence. Shown are data from one representative

919 experiment. WT consortia grow to about 100-fold higher cfu/mL. **c.** Hellinger distance  
 920 between population ratios of all conditions at 12 hr time point calculated for WT and  
 921 engineered consortia. The Hellinger distance for engineered consortia is lower than for  
 922 WT consortia (Mann-Whitney  $p$ -value: 0.0355). **d.** Inferred growth rates and Jacobians  
 923 of the inferred dynamics for both WT and engineered consortia (only interactions with  
 924 Bayes factors greater than 1 shown). The Jacobians provide normalized measures of  
 925 interaction strengths. **e.** Difference between engineered and WT Jacobians identifies 5  
 926 net positive, 7 neutral interactions.  
 927

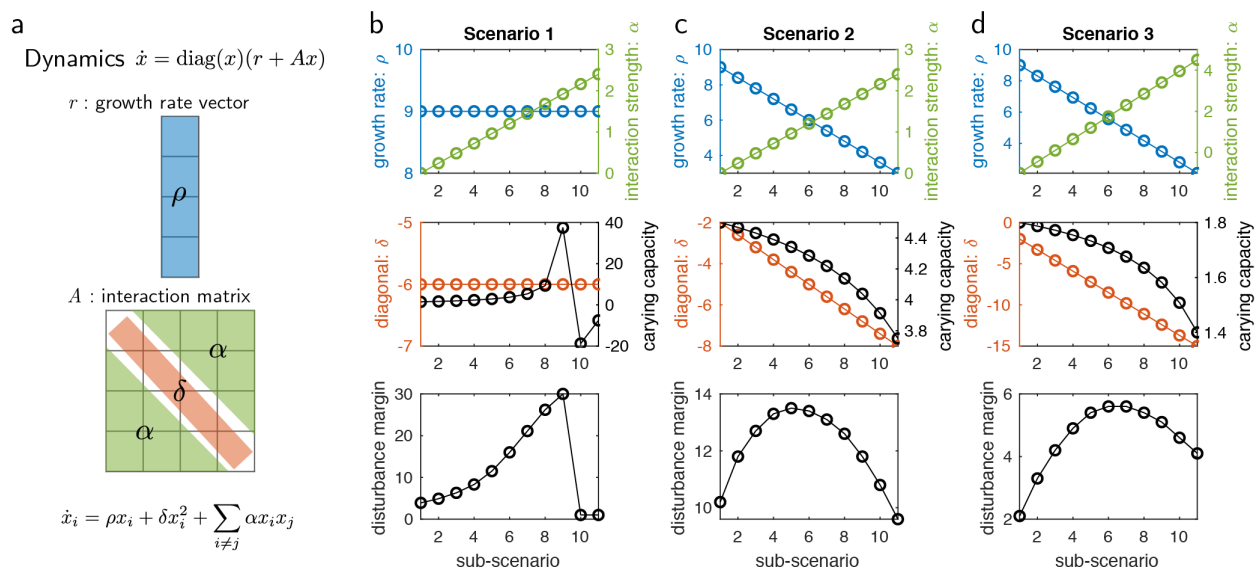

928  
 929 **Figure 5 Simulations investigating consortia stability with different design**  
 930 **constraints. a.** Baseline model of Lotka-Volterra dynamical system parameterized by  
 931 growth rate  $\rho$ , self-interaction  $\delta$  (which is negative), and identical interactions  
 932 coefficients  $\alpha$ , for all species. **b.** Scenario 1: as the interactions coefficient is increased,  
 933 the system has an increased carrying capacity and robustness up to the point of system  
 934 instability. **c.** Scenario 2: interactions coefficient is increased as the magnitude of the  
 935 self-limiting term is increased, and the growth rate is decreased. This results in a more  
 936 realistic scenario and a trade-off between cooperativity and self-interest emerges. **d.**  
 937 Scenario 3: similar to Scenario 2, but instead of the interactions coefficient starting at  
 938 zero, it begins with a negative value (pre-existing competitive interactions), mimicking  
 939 what we observed in our engineered consortia. This also results in a trade-off between  
 940 cooperativity and self-interest, with a higher optimal interactions coefficient than **c.**

941

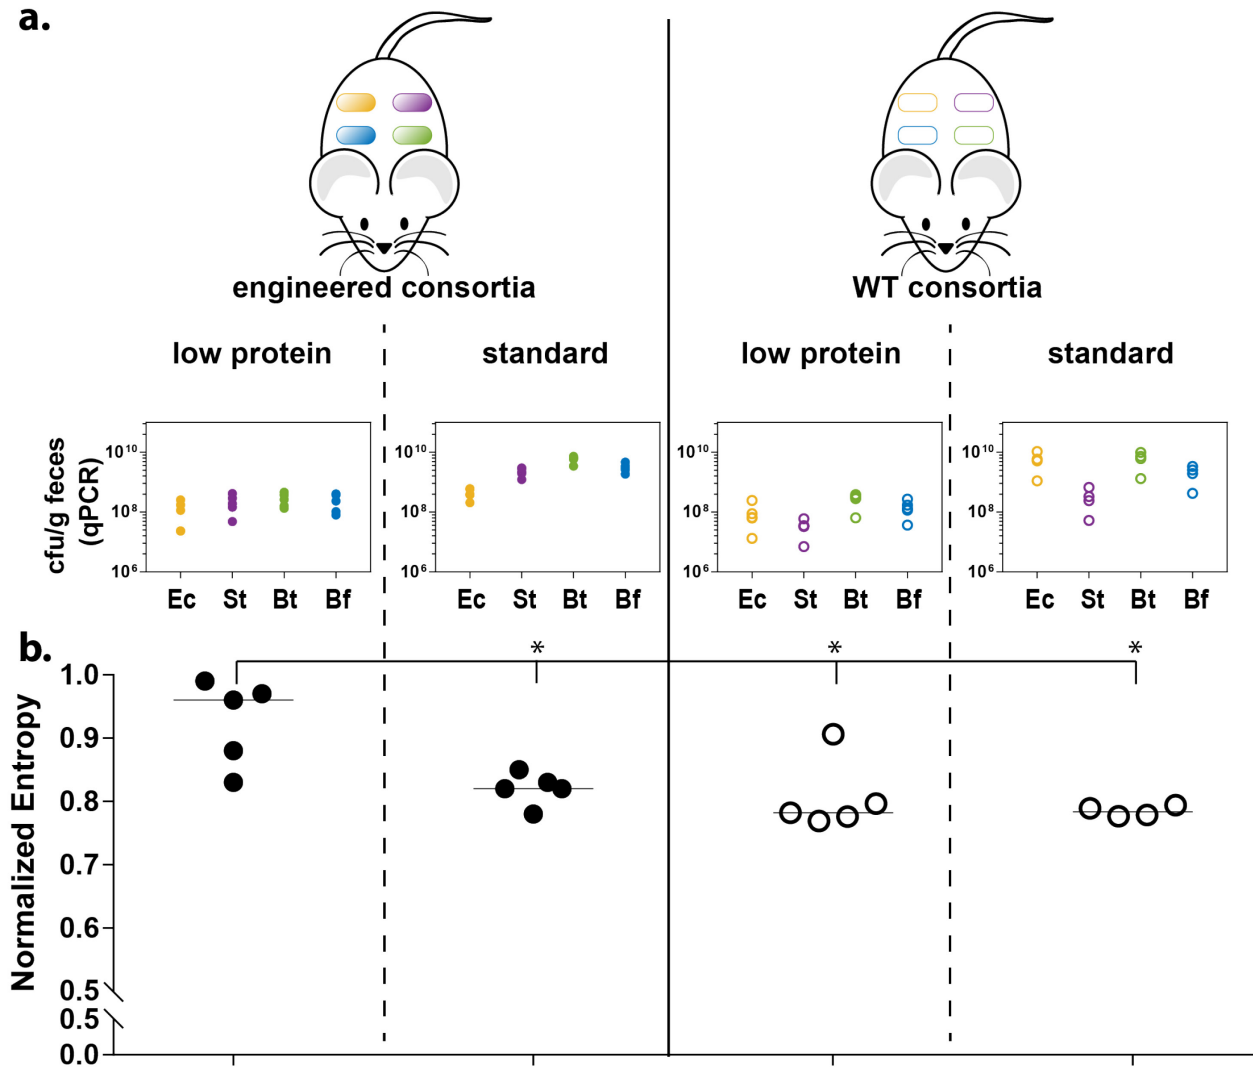

942

943 **Figure 6. Consortia engineering increases population balance in the mammalian**  
 944 **gut in a diet dependent manner. a.** Four groups of 5 germfree mice were either fed  
 945 low protein diet or standard diet, and inoculated with either the engineered or WT  
 946 bacterial consortia. Fecal samples 10 days post-inoculation were analyzed via strain-  
 947 specific qPCR to assess concentrations of each consortia species. **b.** Population  
 948 balance or evenness of consortia, expressed as normalized entropy of the population  
 949 proportions. Bar indicates Median. Mann-Whitney test showed significantly increased  
 950 population of the engineered consortia in mice that were fed low protein diet compared  
 951 to the consortia in the three other groups ( $p$ -values: 0.024, 0.032, 0.015). Ec: *E. coli*; St:  
 952 *S. Typhimurium*; Bt: *B. theta*; Bf: *B. fragilis*.

953  
954  
955  
956  
957  
958  
959  
960  
961  
962

**Table 1 Engineered strains and genotypes.** <sup>a)</sup>prevents feedback inhibition (Veeravalli et al., 2014), <sup>b)</sup>decouples from histidine feedback inhibition (Malykh et al., 2018); <sup>c)</sup>trpE, removes feedback inhibition (Fang et al., 2015); <sup>d)</sup>arginine repressor, nonfunctional (Ginesy et al., 2015)

| Species        | Strain  | Auxotroph Genotype                                          | Other Genotype                                            | Overproduction Mutations            |
|----------------|---------|-------------------------------------------------------------|-----------------------------------------------------------|-------------------------------------|
| E. coli        | NGF     | $\Delta\text{argA}, \Delta\text{trpC}, \Delta\text{hisA}$   | $\Delta\text{thiE}$                                       | $\text{metA}(I296S)^a$              |
| S. Typhimurium | LT2     | $\Delta\text{argA}, \Delta\text{trpC}, \Delta\text{metA}$   | $\Delta\text{thiE}, \Delta\text{SPI1}, \Delta\text{SPI2}$ | $\text{hisG}(E271K)^b$              |
| B theta        | VPI5482 | $\Delta\text{metA}, \Delta\text{hisG}, \Delta\text{argF}$ , | $\Delta\text{thiSEG}, \Delta\text{tdk}$                   | BT_0532 (A306V; N63D) <sup>c)</sup> |
| B. fragilis    | 368R    | $\Delta\text{metA}, \Delta\text{hisG}, \Delta\text{trpC}$   | $\Delta\text{thiSEG}, \Delta\text{tdk}$                   | BF638R_0532 (L26R) <sup>d)</sup>    |

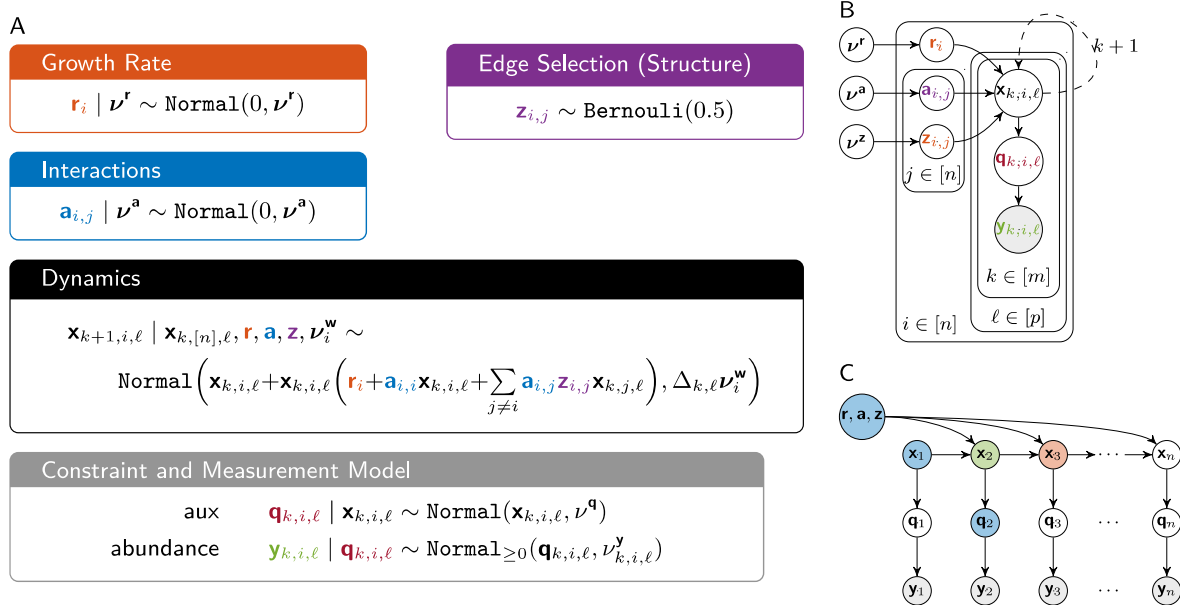

963  
964  
965  
966  
967  
968  
969

**Supplemental Figure 1. a.** Description of key components of our Bayesian dynamical systems model for the consortia. Higher level priors not depicted for simplicity. **b.** Graphical Model depiction with plate notation. **c.** Portion of the Graphical Model unraveled in time, depicting a single time series experiment, and color coded to illustrate our inference method, using Metropolis-Hastings proposals, for filtering the latent state. The proposal uses information from the blue nodes to propose for the green

970 node, but does not use future time information highlighted in red. The future information  
971 is however accounted for in the target distribution and thus the algorithm samples from  
972 the true posterior.

973

974

975

976

977

978

979

980

981

982

983

984

985

986

987

988

989

990

991

992

993

994

995

996

997

998

999 **References**

1000 Atarashi, K., Tanoue, T., Oshima, K., Suda, W., Nagano, Y., Nishikawa, H., Fukuda, S.,

- 1001 Fritz, V., Wilmes, P., Ueha, S., et al. induction by a rationally selected mixture of  
1002 Clostridia strains from the human microbiota.
- 1003 Baba, T., Ara, T., Hasegawa, M., Takai, Y., Okumura, Y., Baba, M., Datsenko, K. a,  
1004 Tomita, M., Wanner, B.L., and Mori, H. (2006). Construction of *Escherichia coli* K-12 in-  
1005 frame, single-gene knockout mutants: the Keio collection. *Mol. Syst. Biol.* 2, 2006.0008.
- 1006 Bauer, M.A., Kainz, K., Carmona-Gutierrez, D., and Madeo, F. (2018). Microbial wars:  
1007 competition in ecological niches and within the microbiome. *Microb. Cell* 5, 215–219.
- 1008 Becker, J., and Wittmann, C. (2012). Systems and synthetic metabolic engineering for  
1009 amino acid production - the heartbeat of industrial strain development. *Curr. Opin.*  
1010 *Biotechnol.* 23, 718–726.
- 1011 Boyle, M.L. (2015). Fecal Microbiota Transplant to Treat Recurrent *Clostridium difficile*  
1012 Infections. 35.
- 1013 Bucci, V., Tzen, B., Li, N., Simmons, M., Tanoue, T., Bogart, E., Deng, L., Yeliseyev, V.,  
1014 Delaney, M.L., Liu, Q., et al. (2016). MDSINE: Microbial Dynamical Systems INference  
1015 Engine for microbiome time-series analyses. *Genome Biol.* 17, 121.
- 1016 Burkovski, A., Weil, B., and Krämer, R. (1995). Glutamate excretion in *Escherichia coli*:  
1017 dependency on the *relA* and *spoT* genotype. *Arch. Microbiol.* 164, 24–28.
- 1018 Burmølle, M., Webb, J.S., Rao, D., Hansen, L.H., Sørensen, S.J., and Kjelleberg, S.  
1019 (2006). Enhanced Biofilm Formation and Increased Resistance to Antimicrobial Agents  
1020 and Bacterial Invasion Are Caused by Synergistic Interactions in Multispecies Biofilms  
1021 †. 72, 3916–3923.
- 1022 Carlson, R.P., Beck, A.E., Phalak, P., Fields, M.W., Gedeon, T., Hanley, L., Harcombe,  
1023 W.R., Henson, M.A., and Heys, J.J. (2018). Competitive resource allocation to  
1024 metabolic pathways contributes to overflow metabolisms and emergent properties in  
1025 cross-feeding microbial consortia. 269–284.
- 1026 Cavaliere, M., Feng, S., and Jim, I. (2017). Minireview Cooperation in microbial  
1027 communities and their biotechnological applications. 19, 2949–2963.
- 1028 Cherepanov, P.P., and Wackernagel, W. (1995). Gene disruption in *Escherichia coli*:  
1029 TcR and KmR cassettes with the option of Flp-catalyzed excision of the antibiotic-  
1030 resistance determinant. *Gene* 158, 9–14.
- 1031 Darling, A.C.E., Mau, B., Blattner, F.R., and Perna, N.T. (2004). Mauve : Multiple  
1032 Alignment of Conserved Genomic Sequence With Rearrangements. 1394–1403.
- 1033 Estrela, S., and Gudelj, I. (2010). Evolution of Cooperative Cross-Feeding Could Be  
1034 Less Challenging Than Originally Thought. *PLoS One* 5.
- 1035 Fang, M., Zhang, C., Yang, S., Cui, J., Jiang, P., Lou, K., Wachi, M., and Xing, X.



- 1036 (2015). High crude violacein production from glucose by *Escherichia coli* engineered  
1037 with interactive control of tryptophan pathway and violacein biosynthetic pathway. 1–13.
- 1038 Ferrières, L., Hémerly, G., Nham, T., Guérout, A.M., Mazel, D., Beloin, C., and Ghigo,  
1039 J.M. (2010). Silent mischief: Bacteriophage Mu insertions contaminate products of  
1040 *Escherichia coli* random mutagenesis performed using suicidal transposon delivery  
1041 plasmids mobilized by broad-host-range RP4 conjugative machinery. *J. Bacteriol.* *192*,  
1042 6418–6427.
- 1043 Gibson, T.E., and Gerber, G.K. (2018). Robust and Scalable Models of Microbiome  
1044 Dynamics.
- 1045 Gibson, T.E., Carey, V., Bashan, A., Hohmann, E.L., Weiss, S.T., and Liu, Y.-Y. (2017).  
1046 On the Stability Landscape of the Human Gut Microbiome: Implications for Microbiome-  
1047 based Therapies. *BioRxiv* 176941.
- 1048 Ginesy, M., Belotserkovsky, J., Enman, J., Isaksson, L., and Rova, U. (2015). Metabolic  
1049 engineering of *Escherichia coli* for enhanced arginine biosynthesis. *Microb. Cell Fact.*  
1050 *14*, 1–11.
- 1051 Hays, S.G., Patrick, W.G., Ziesack, M., Oxman, N., and Silver, P.A. (2015a).  
1052 ScienceDirect Better together : engineering and application of microbial symbioses.  
1053 *Curr. Opin. Biotechnol.* *36*, 40–49.
- 1054 Hays, S.G., Patrick, W.G., Ziesack, M., Oxman, N., and Silver, P.A. (2015b). Better  
1055 together: Engineering and application of microbial symbioses. *Curr. Opin. Biotechnol.*  
1056 *36*, 40–49.
- 1057 Hider, R.C., and Kong, X. (2010). Chemistry and biology of siderophores. *Nat. Prod.*  
1058 *Rep.* *27*, 637–657.
- 1059 Kaderbhai, N.N., Broadhurst, D.I., Ellis, D.I., Goodacre, R., and Kell, D.B. (2003).  
1060 Functional genomics via metabolic footprinting: Monitoring metabolite secretion by  
1061 *Escherichia coli* tryptophan metabolism mutants using FT-IR and direct injection  
1062 electrospray mass spectrometry. *Comp. Funct. Genomics* *4*, 376–391.
- 1063 Kerner, A., Park, J., Williams, A., and Lin, X.N. (2012). A programmable *Escherichia coli*  
1064 consortium via tunable symbiosis. *PLoS One* *7*, 1–10.
- 1065 Kong, W., Meldgin, D.R., Collins, J.J., and Lu, T. (2018). Designing microbial consortia  
1066 with defined social interactions. *Nat. Chem. Biol.* *14*.
- 1067 Kotula, J.W., Kerns, S.J., Shaket, L. a, Siraj, L., Collins, J.J., Way, J.C., and Silver, P. a  
1068 (2014). Programmable bacteria detect and record an environmental signal in the  
1069 mammalian gut. *Proc. Natl. Acad. Sci. U. S. A.* *111*, 4838–4843.
- 1070 Lapara, T.M., Zakharova, T., Nakatsu, C.H., and Konopka, A. (2002). Functional and  
1071 Structural Adaptations of Bacterial Communities Growing on Particulate Substrates

- 1072 under Stringent Nutrient Limitation. 317–326.
- 1073 Malykh, E.A., Butov, I.A., Ravcheeva, A.B., Krylov, A.A., and Mashko, S. V (2018).  
1074 Specific features of l - histidine production by *Escherichia coli* concerned with feedback  
1075 control of AICAR formation and inorganic phosphate / metal transport. *Microb. Cell Fact.*  
1076 1–15.
- 1077 McCutcheon, J.P., and Von Dohlen, C.D. (2011). An interdependent metabolic  
1078 patchwork in the nested symbiosis of mealybugs. *Curr. Biol.* 21, 1366–1372.
- 1079 Mee, M.T., Collins, J.J., Church, G.M., and Wang, H.H. (2014). Syntrophic exchange in  
1080 synthetic microbial communities. *Proc. Natl. Acad. Sci. U. S. A.* 111, E2149-56.
- 1081 Mimee, M., Tucker, A.C., Voigt, C.A., and Lu, T.K. (2015). Programming a Human  
1082 Commensal Bacterium, *Bacteroides thetaiotaomicron*, to Sense and Respond to Stimuli  
1083 in the Murine Gut Microbiota. *Cell Syst.* 18, 386–392.
- 1084 Minty, J.J., Singer, M.E., Scholz, S. a, Bae, C.-H., Ahn, J.-H., Foster, C.E., Liao, J.C.,  
1085 and Lin, X.N. (2013). Design and characterization of synthetic fungal-bacterial consortia  
1086 for direct production of isobutanol from cellulosic biomass. *Proc. Natl. Acad. Sci. U. S.*  
1087 *A.* 110, 14592–14597.
- 1088 Nowak, M.A. (2006). Five Rules for the Evolution of Cooperation. 314, 1560–1564.
- 1089 Pande, S., Merker, H., Bohl, K., Reichelt, M., Schuster, S., Figueiredo, F. De, Kaleta,  
1090 C., and Kost, C. (2014). Fitness and stability of obligate cross-feeding interactions that  
1091 emerge upon gene loss in bacteria. 953–962.
- 1092 Ponomarova, O., Gabrielli, N., Sévin, D.C., Müllleder, M., Zirngibl, K., Bulyha, K.,  
1093 Andrejev, S., Kafkia, E., Typas, A., Sauer, U., et al. (2017). Yeast Creates a Niche for  
1094 Symbiotic Lactic Acid Bacteria through Nitrogen Overflow. *Cell Syst.* 5, 345–357.e6.
- 1095 Rakoff-Nahoum, S., Foster, K.R., and Comstock, L.E. (2016). The evolution of  
1096 cooperation within the gut microbiota. *Nature* 533, 255–259.
- 1097 Ratzke, C., Denk, J., and Gore, J. (2018). Ecological suicide in microbes. *Nat. Ecol.*  
1098 *Evol.* 2, 867–872.
- 1099 Ravindran, R., Loebbermann, J., Nakaya, H.I., Khan, N., Ma, H., Gama, L., Machiah,  
1100 D.K., Lawson, B., Hakimpour, P., Wang, Y.C., et al. (2016). The amino acid sensor  
1101 GCN2 controls gut inflammation by inhibiting inflammasome activation. *Nature* 531,  
1102 523–527.
- 1103 Riglar, D.T., and Silver, P.A. (2018). Engineering bacteria for diagnostic and therapeutic  
1104 applications. *Nat. Rev. Microbiol.* 16, 214–225.
- 1105 Riglar, D.T., Giessen, T.W., Baym, M., Kerns, S.J., Niederhuber, M.J., Bronson, R.T.,  
1106 Kotula, J.W., Gerber, G.K., Way, J.C., and Silver, P.A. (2017). Engineered bacteria can

- 1107 function in the mammalian gut long-term as live diagnostics of inflammation. *Nat.*  
1108 *Biotechnol.* **35**, 653–658.
- 1109 Savage, V.M., Webb, C.T., and Norberg, J. (2007). A general multi-trait-based  
1110 framework for studying the effects of biodiversity on ecosystem functioning. **247**, 213–  
1111 229.
- 1112 Stelling, J., Sauer, U., Szallasi, Z., Doyle, F.J., Doyle, J., Zu, C.-, and Barbara, S.  
1113 (2004). Robustness of Cellular Functions. **118**, 675–685.
- 1114 Stenuit, B., and Agathos, S.N. (2015). Deciphering microbial community robustness  
1115 through synthetic ecology and molecular systems synecology. *Curr. Opin. Biotechnol.*  
1116 **33**, 305–317.
- 1117 Stolyar, S., Van Dien, S., Hillesland, K.L., Pinel, N., Lie, T.J., Leigh, J.A., and Stahl,  
1118 D.A. (2007). Metabolic modeling of a mutualistic microbial community. *Mol. Syst. Biol.* **3**,  
1119 1–14.
- 1120 Thomason, L.C., Costantino, N., and Court, D.L. (2007). *E. coli* genome manipulation by  
1121 P1 transduction. *Curr. Protoc. Mol. Biol.* *Chapter 1*, Unit 1.17.
- 1122 Valle, J., Da Re, S., Schmid, S., Skurnik, D., D’Ari, R., and Ghigo, J.M. (2008). The  
1123 amino acid valine is secreted in continuous-flow bacterial biofilms. *J. Bacteriol.* **190**,  
1124 264–274.
- 1125 Veeravalli, K., Laird, M.W., Fedesco, M., Zhang, Y., and Yu, X.C. (2014). Strain  
1126 Engineering to Prevent Norleucine Incorporation During Recombinant Protein  
1127 Production in *Escherichia coli*.
- 1128 Venail, P.A., and Vives, M.J. (2013). Positive Effects of Bacterial Diversity on  
1129 Ecosystem Functioning Driven by Complementarity Effects in a Bioremediation Context.  
1130 **8**.
- 1131 West, S.A., Griffin, A.S., Gardner, A., and Diggle, S.P. (2006). Social evolution theory  
1132 for microorganisms. **4**, 597–607.
- 1133 Wintermute, E.H., and Silver, P.A. (2010a). Emergent cooperation in microbial  
1134 metabolism. *Mol. Syst. Biol.* **6**, 1–7.
- 1135 Wintermute, E.H., and Silver, P.A. (2010b). Emergent cooperation in microbial  
1136 metabolism. *Mol. Syst. Biol.* **6**, 1–7.
- 1137 Zhou, K., Qiao, K., Edgar, S., and Stephanopoulos, G. (2015). Distributing a metabolic  
1138 pathway among a microbial consortium enhances production of natural products. *Nat.*  
1139 *Biotechnol.* **33**, 377–383.
- 1140 Zomorodi, A.R., and Segrè, D. (2016). Synthetic Ecology of Microbes : Mathematical  
1141 Models and Applications. *J. Mol. Biol.* **428**, 837–861.

1142

1143

1144

1145
