# Supplementary material for: Engineered inter-species amino acid cross-feeding increases population evenness in a synthetic bacterial consortium
Source: bioRxiv or medRxiv preprint supplement (doi:10.1101/426171), 2019-07-18
Supplement: Supplementary file [file 426171-1.pdf]

**Table S1 SNP analysis of overproducer mutants.** We analyzed SNPs in respective amino acid biosynthesis pathways, transport and degradation.

|                | Process      | gene           | SNP                       | protein level         | outcome                                                                                                   | literature         | notes                                                           |
|----------------|--------------|----------------|---------------------------|-----------------------|-----------------------------------------------------------------------------------------------------------|--------------------|-----------------------------------------------------------------|
| E. coli NGF    | Biosynthesis | metA           | ATC -> AGC                | I296S                 | prevents feedback inhibition --> increases production, prevents norleucine uptake could affect production | Laird et al. 2014  |                                                                 |
|                |              | metH           | GCG -> GGG<br>CAA --> AAA | A1191G<br>Q1194K      |                                                                                                           |                    |                                                                 |
|                |              | aspC           | T -> G                    | promoter: -8          | makes precursors aspartate so could also improve production                                               |                    |                                                                 |
|                | Transport    | metP           |                           |                       | could be mutated                                                                                          |                    | sequence unknown                                                |
| S. Typhimurium | Biosynthesis | hisG           | GAA -> AAA                | E271K                 | decoupled from histidine feedback inhibition                                                              | Malykh et al 2018  |                                                                 |
|                |              | hisI           | CGC -> CGA                | silent                |                                                                                                           |                    |                                                                 |
|                |              | hisA           | GTG -> GGG                | V112G                 |                                                                                                           |                    |                                                                 |
|                | Degradation  | hutH           | TTG -> CTG                | silent                |                                                                                                           |                    |                                                                 |
|                |              | hutG           | TGG -> GGG                | W208G                 |                                                                                                           |                    |                                                                 |
|                |              |                | AAT -> GAT                | N210D                 |                                                                                                           |                    |                                                                 |
|                |              |                | GTG -> GGG                | V214G                 |                                                                                                           |                    |                                                                 |
|                |              |                | GAG -> GGG                | E215G                 |                                                                                                           |                    |                                                                 |
|                | Transport    | hisJ           | T->G                      | promoter              |                                                                                                           |                    |                                                                 |
|                |              | hisQ           | 5 mutations               | between -151 and -177 |                                                                                                           |                    |                                                                 |
| hisP           |              | GGT -> GGG     | silent                    |                       |                                                                                                           |                    |                                                                 |
|                |              |                |                           |                       |                                                                                                           |                    |                                                                 |
| B. theta       | Biosynthesis | BT_0531        |                           |                       | one or both of these could remove feedback inhibition                                                     | Fang et al. 2015   |                                                                 |
|                |              | BT_0532 (trpE) | GCC -> GTC                | A306V                 |                                                                                                           |                    |                                                                 |
|                |              |                | AAT -> GAT                | N63D                  | different mutations have been described for E. coli                                                       |                    |                                                                 |
|                |              | BT_0527 (trpA) | ATT -> AGT                | I4S                   |                                                                                                           |                    |                                                                 |
|                |              |                | TGC -> GGC                | C222G                 |                                                                                                           |                    |                                                                 |
|                | GAA -> GGA   | E223G          |                           |                       |                                                                                                           |                    |                                                                 |
|                | TCC -> ACC   | S226T          |                           |                       |                                                                                                           |                    |                                                                 |
| B. fragilis    | Biosynthesis | BF638R_0532    | CTC -> CGC                | L26R                  | arginine repressor, possibly made unfunctional (interface, arginine binding)                              | Ginesy et al. 2015 | could not find arginine transport system, could also be mutated |

**Table S2 qPCR probes and primers.**

|                       |                | <b>Sequence</b>            | <b>Dye</b> | <b>Notes</b>                                                                                                                                 |
|-----------------------|----------------|----------------------------|------------|----------------------------------------------------------------------------------------------------------------------------------------------|
| <i>B. fragilis</i>    | Forward Primer | GCTTGCTTCCAGTCGTCTAT       |            | Specific to <i>B. fragilis</i> (including 638R and NCTC 9343)                                                                                |
|                       | Probe          | AGGCAGATTGCACAAGAAATGGCG   | Hex        |                                                                                                                                              |
|                       | Reverse Primer | ATTGCAGCATTATCCACAAACA     |            |                                                                                                                                              |
| <i>B. theta</i>       | Forward Primer | GCCAACCACGCTAACAATTAC      |            | Specific to <i>B. thetaiotaomicron</i> (includes strain 7330 and VPI-5482)                                                                   |
|                       | Probe          | CCGTAATCCATCAGATGAAACCGGCT | Texas Red  |                                                                                                                                              |
|                       | Reverse Primer | GTTGCTTCGGAGAGATGTATCA     |            |                                                                                                                                              |
| <i>S. Typhimurium</i> | Forward Primer | CTGCCGAACCTCGTCAAA         |            | Specific to <i>Salmonella enterica</i> (many serovars)<br>- outside of any island or removed region                                          |
|                       | Probe          | TCGCAGGATAACCGAACGTGACTT   | Cy5.5      |                                                                                                                                              |
|                       | Reverse Primer | CGAATTATGGCGGGTGAAATG      |            |                                                                                                                                              |
| <i>E. coli</i>        | Forward Primer | CTATCCCAGATTGGGCTTCTTG     |            | Returns two results only: assembly FHI72 and <i>E. coli</i> 536 (no K12 or common strains). Our NGF-1 sequence is not yet a part of the NCBI |
|                       | Probe          | TCCTGGTCCTCCTGATGGTGAAGT   | Cy5        |                                                                                                                                              |
|                       | Reverse Primer | CCATTGGTCAGGGTGCTAAA       |            |                                                                                                                                              |
